# Supplementary material for: TEMPO-catalyzed oxidative homocoupling route to 3,2′-biindolin-2-ones via an indolin-3-one intermediate
Source: Royal Society of Chemistry journal article supplement (doi:10.1039/c6ra24834a), 2017-01-01
Supplement: c6ra24834a1.pdf [file c6ra24834a1.pdf]

## Supporting Information for

# TEMPO-Catalyzed Oxidative Homocoupling Route to 3,2'-Biindolin-2-ones via an Indolin-3-one Intermediate

Bo Yin, Panpan Huang, Yingbing Lu,\* Liangxian Liu\*

*Key Laboratory of Organo-Pharmaceutical Chemistry of Jiangxi Province, Gannan Normal  
University, Ganzhou 341000, PR China*

*E-mail: lxliu@xmu.edu.cn*

### CONTENTS

|                                                                                          |    |
|------------------------------------------------------------------------------------------|----|
| 1. General Methods.....                                                                  | 2  |
| 2. General Procedure and Spectroscopic Data of the Products <b>9</b> and <b>13</b> ..... | 2  |
| 3. Copies of <sup>1</sup> H, <sup>13</sup> C Spectra .....                               | 8  |
| 4. Copies of HRESIMS Spectra.....                                                        | 25 |
| 5. X-ray Data of Compound <b>9a</b> .....                                                | 30 |

## 1. General Methods

Melting points were determined on a digital melting point apparatus and temperatures were uncorrected. Infrared spectra were measured with a Nicolet Avatar 360 FT-IR spectrometer using film KBr pellet techniques.  $^1\text{H}$  and  $^{13}\text{C}$  NMR spectra were recorded on a Bruker spectrometers at 400 and 100 MHz, respectively. Chemical shifts were reported in ppm relative to TMS for  $^1\text{H}$  and  $^{13}\text{C}$  NMR spectra. DMSO- $d_6$  was used as the NMR solvent. Mass spectra were recorded with Bruker Dalton Esquire 3000 plus LC-MS apparatus. Elemental analysis was carried out on a Perkin-Elmer 240B instrument. HRFABMS spectra were recorded on a FTMS apparatus. Silica gel (300-400 mesh) was used for flash column chromatography, eluting (unless otherwise stated) with an ethyl acetate/petroleum ether (PE) (60-90 °C) mixture.

## 2. General Procedure for the Preparation of 9.

To a solution of indole (0.3 mmol),  $\text{Ag}_2\text{CO}_3$  (0.105 mmol), and NaOAc (0.03 mmol) in DMF (1 mL) was added TEMPO (0.045 mmol) under an air atmosphere and the mixture was stirred at 80 °C for 12 h. The reaction mixture was concentrated under reduced pressure. The residue was purified by flash chromatography on silica gel (eluent: EtOAc/PE = 1:4) to yield the corresponding product **9**.

### Spectroscopic Data of the Products 9.

#### 2,3'-Bi(3*H*-indol)-3-one (**9a**)

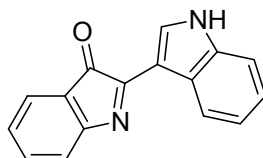

Red solid, mp: 214-215 °C (from EtOAc/PE = 1:4). IR (KBr)  $\nu_{\text{max}}$ : 3187, 1719, 1604, 1559, 1447, 1368, 1240, 1135  $\text{cm}^{-1}$ .  $^1\text{H}$  NMR (400 MHz, DMSO- $d_6$ ):  $\delta$  12.14 (s, 1H, NH), 8.50 (d,  $J = 3.0$  Hz, 1H, Ar-H), 8.40 (dd,  $J = 7.0, 2.5$  Hz, 1H, Ar-H), 7.59-7.50 (m, 3H, Ar-H), 7.34 (d,  $J = 7.5$  Hz, 1H, Ar-H), 7.28-7.24 (m, 2H, Ar-H), 7.18 (dt,  $J = 0.5, 7.5$  Hz, 1H, Ar-H).  $^{13}\text{C}$  NMR (100 MHz, DMSO- $d_6$ ):  $\delta$  195.7, 163.4, 158.5, 137.8, 137.3, 133.7, 126.8, 126.4, 124.9, 123.9, 123.0, 122.9, 122.2, 121.1, 113.0, 106.9. HRESIMS calcd for  $[\text{C}_{16}\text{H}_{10}\text{N}_2\text{O} + \text{H}]^+$  247.08714, found 247.08625.

#### 5,5'-Difluoro-2,3'-bi(3*H*-indol)-3-one (**9b**)

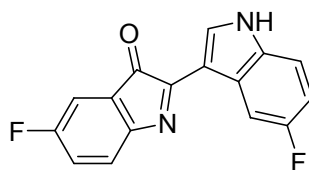

Red solid, mp: 193-195 °C (from EtOAc/PE = 1:4). IR (KBr)  $\nu_{\text{max}}$ : 3460, 1723, 1626, 1572, 1469, 1358, 1263, 1125,  $\text{cm}^{-1}$ .  $^1\text{H}$  NMR (400 MHz, DMSO- $d_6$ ):  $\delta$  12.23 (s, 1H, NH), 8.49 (s, 1H, Ar-H), 8.02 (d,  $J = 8.7$  Hz, 1H, Ar-H), 7.53 (q,  $J = 4.3$  Hz, 1H, Ar-H), 7.38 (d,  $J = 4.3$  Hz, 2H, Ar-H), 7.37 (s, 1H, Ar-H), 7.11 (t,  $J = 8.7$  Hz, 1H, Ar-H).  $^{13}\text{C}$  NMR (100 MHz, DMSO- $d_6$ ):  $\delta$  194.2, 161.2 (d,  $J = 237.05$  Hz), 159.0 (d,  $J = 2.3$  Hz), 158.9 (d,  $J = 227.8$  Hz), 158.8 (d,  $J = 4.0$  Hz), 134.9, 133.8, 126.9 (d,  $J = 11.0$  Hz), 124.2 (d,  $J = 7.9$  Hz), 123.0 (d,  $J = 23.7$  Hz), 122.2 (d,  $J = 7.6$  Hz), 114.3 (d,  $J = 9.8$  Hz), 112.5 (d,  $J = 25.3$  Hz), 112.0 (d,  $J = 25.9$  Hz), 107.6 (d,  $J = 24.7$  Hz), 106.8 (d,  $J = 4.3$  Hz). HRESIMS calcd for  $[\text{C}_{16}\text{H}_8\text{F}_2\text{N}_2\text{O} + \text{H}]^+$  283.06829, found 283.06662.

#### 5,5'-Dibromo-2,3'-bi(3*H*-indol)-3-one (**9c**)

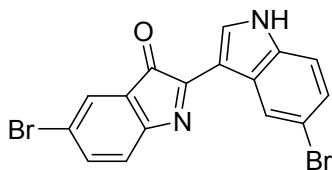

Red solid, mp: 157-159 °C (from EtOAc/PE = 1:4). IR (KBr)  $\nu_{\max}$ : 3409, 1728, 1560, 1440, 1351, 1286, 1104, 1019  $\text{cm}^{-1}$ .  $^1\text{H}$  NMR (400 MHz,  $\text{DMSO-}d_6$ ):  $\delta$  12.32 (s, 1H, NH), 8.46 (s, 2H, Ar-H), 7.70 (dd,  $J = 8.0, 1.6$  Hz, 1H, Ar-H), 7.59 (s, 1H, Ar-H), 7.49 (d,  $J = 8.5$  Hz, 1H, Ar-H), 7.38 (dd,  $J = 8.5, 1.6$  Hz, 1H, Ar-H), 7.32 (d,  $J = 8.0$  Hz, 1H, Ar-H).  $^{13}\text{C}$  NMR (100 MHz,  $\text{DMSO-}d_6$ ):  $\delta$  193.3, 161.4, 157.7, 139.0, 135.6, 134.5, 127.6, 126.9, 126.0, 124.4, 124.3, 122.5, 118.4, 114.6, 114.5, 105.8. HRESIMS calcd for  $[\text{C}_{16}\text{H}_8\text{Br}_2\text{N}_2\text{O} + \text{H}]^+$  402.90816 (51%), 404.90612 (100%), found 402.90646 (51%), 404.90418 (100%).

5,5'-Dimethyl-2,3'-bi(3H-indol)-3-one (**9d**)

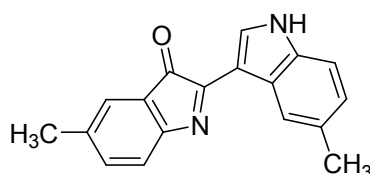

Red amorphous solid. IR (KBr)  $\nu_{\max}$ : 3415, 1719, 1611, 1559, 1473, 1354, 1207, 1105  $\text{cm}^{-1}$ .  $^1\text{H}$  NMR (400 MHz,  $\text{DMSO-}d_6$ ):  $\delta$  11.99 (s, 1H, NH), 8.41 (s, 1H, Ar-H), 8.17 (s, 1H, Ar-H), 7.39 (d,  $J = 8.2$  Hz, 1H, Ar-H), 7.31 (d,  $J = 7.5$  Hz, 1H, Ar-H), 7.28 (s, 1H, Ar-H), 7.21 (d,  $J = 7.5$  Hz, 1H, Ar-H), 7.07 (d,  $J = 8.2$  Hz, 1H, Ar-H), 2.43 (s, 3H,  $\text{CH}_3$ ), 2.27 (s, 3H,  $\text{CH}_3$ ).  $^{13}\text{C}$  NMR (100 MHz,  $\text{DMSO-}d_6$ ):  $\delta$  196.0, 161.3, 158.0, 137.7, 136.2, 135.5, 133.3, 131.0, 125.7, 125.4, 125.3, 123.0, 122.6, 120.7, 112.6, 106.6, 21.8, 20.9. HRESIMS calcd for  $[\text{C}_{18}\text{H}_{14}\text{N}_2\text{O} + \text{H}]^+$  275.11844, found 275.11810.

5,5'-Dimethoxy-2,3'-bi(3H-indol)-3-one (**9e**)

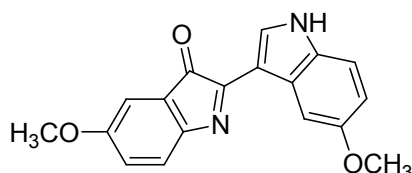

Red solid, mp: 198-199 °C (from EtOAc/PE = 1:4). IR (KBr)  $\nu_{\max}$ : 3429, 1724, 1619, 1557, 1477, 1360, 1216, 1135, 1029  $\text{cm}^{-1}$ .  $^1\text{H}$  NMR (400 MHz,  $\text{DMSO-}d_6$ ):  $\delta$  11.93 (s, 1H, NH), 8.37 (d,  $J = 3.0$  Hz, 1H, Ar-H), 7.87 (d,  $J = 2.5$  Hz, 1H, Ar-H), 7.41 (d,  $J = 8.8$  Hz, 1H, Ar-H), 7.24 (d,  $J = 7.9$  Hz, 1H, Ar-H), 7.06 (s, 1H, Ar-H), 7.05 (dd,  $J = 3.0, 7.9$  Hz, 1H, Ar-H), 6.89 (dd,  $J = 8.8, 2.5$  Hz, 1H, Ar-H), 3.81 (s, 3H,  $\text{OCH}_3$ ), 3.78 (s, 3H,  $\text{OCH}_3$ ).  $^{13}\text{C}$  NMR (100 MHz,  $\text{DMSO-}d_6$ ):  $\delta$  195.9, 158.6, 157.7, 156.3, 155.8, 133.0, 132.0, 127.1, 123.9, 121.7, 121.4, 113.6, 113.2, 111.2, 106.8, 105.2, 56.3, 55.9. HRESIMS calcd for  $[\text{C}_{18}\text{H}_{14}\text{N}_2\text{O}_3 + \text{H}]^+$  307.10827, found 307.10690.

5,5'-Bis(benzyloxy)-2,3'-bi(3H-indol)-3-one (**9f**)

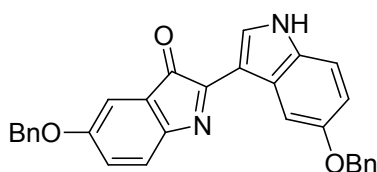

Red solid, mp: 167-169 °C (from EtOAc/PE = 1:3). IR (KBr)  $\nu_{\max}$ : 3419, 1719, 1617, 1562, 1470, 1382, 1270, 1126, 1018  $\text{cm}^{-1}$ .  $^1\text{H}$  NMR (400 MHz,  $\text{DMSO-}d_6$ ):  $\delta$  11.96 (s, 1H, NH), 8.37 (d,  $J$  = 2.6 Hz, 1H, Ar-H), 7.98 (d,  $J$  = 2.3 Hz, 1H, Ar-H), 7.51 (d,  $J$  = 7.4 Hz, 2H, Ar-H), 7.46-7.38 (m, 7H, Ar-H), 7.35-7.30 (m, 2H, Ar-H), 7.26 (d,  $J$  = 8.9 Hz, 1H, Ar-H), 7.16 (s, 1H, Ar-H), 7.14 (d,  $J$  = 6.9 Hz, 1H, Ar-H), 6.98 (dd,  $J$  = 8.9, 2.3 Hz, 1H, Ar-H), 5.14 (s, 4H,  $\text{OCH}_2$ ).  $^{13}\text{C}$  NMR (100 MHz,  $\text{DMSO-}d_6$ ):  $\delta$  195.8, 157.8, 157.6, 156.6, 154.8, 137.9, 137.3, 133.1, 132.2, 128.9, 128.8, 128.4, 128.3, 128.2, 128.1, 127.1, 123.8, 122.6, 121.7, 113.6, 113.5, 112.0, 107.0, 106.8, 70.5, 70.4. HRESIMS calcd for  $[\text{C}_{30}\text{H}_{22}\text{N}_2\text{O}_3 + \text{H}]^+$  459.17087, found 459.17087.

6,6'-Difluoro-2,3'-bi(3*H*-indol)-3-one (**9g**)

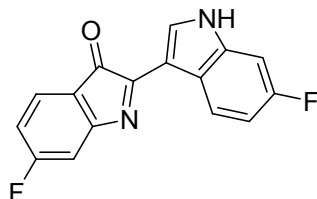

Red solid, mp: 203-205 °C (from EtOAc/PE = 1:4). IR (KBr)  $\nu_{\max}$ : 3381, 1717, 1615, 1563, 1422, 1366, 1232, 1122, 1084  $\text{cm}^{-1}$ .  $^1\text{H}$  NMR (400 MHz,  $\text{DMSO-}d_6$ ):  $\delta$  12.24 (s, 1H, NH), 8.50 (s, 1H, Ar-H), 8.31 (t,  $J$  = 6.2 Hz, 1H, Ar-H), 7.55 (t,  $J$  = 6.2 Hz, 1H, Ar-H), 7.32 (d,  $J$  = 8.9 Hz, 1H, Ar-H), 7.18 (d,  $J$  = 8.9 Hz, 1H, Ar-H), 7.10 (t,  $J$  = 8.4 Hz, 1H, Ar-H), 6.95 (t,  $J$  = 8.4 Hz, 1H, Ar-H).  $^{13}\text{C}$  NMR (100 MHz,  $\text{DMSO-}d_6$ ):  $\delta$  193.3, 168.4 (d,  $J$  = 254.3 Hz), 166.2 (d,  $J$  = 13.6 Hz), 160.2 (d,  $J$  = 237.9 Hz), 159.8, 137.5 (d,  $J$  = 12.8 Hz), 135.2, 126.9 (d,  $J$  = 11.5 Hz), 124.0 (d,  $J$  = 10.0 Hz), 123.0, 119.5 (d,  $J$  = 2.5 Hz), 112.8 (d,  $J$  = 23.6 Hz), 110.6 (d,  $J$  = 24.0 Hz), 109.5 (d,  $J$  = 25.1 Hz), 106.8, 99.5 (d,  $J$  = 26.0 Hz). HRESIMS calcd for  $[\text{C}_{16}\text{H}_8\text{F}_2\text{N}_2\text{O} + \text{H}]^+$  283.06829, found 283.06872.

6,6'-Dichloro-2,3'-bi(3*H*-indol)-3-one (**9h**)

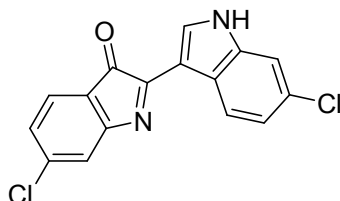

Red solid, mp: 210-212 °C (from EtOAc/PE = 1:4). IR (KBr)  $\nu_{\max}$ : 3397, 1717, 1559, 1406, 1356, 1256, 1128, 1057  $\text{cm}^{-1}$ .  $^1\text{H}$  NMR (400 MHz,  $\text{DMSO-}d_6$ ):  $\delta$  12.25 (s, 1H, NH), 8.49 (s, 1H, Ar-H), 8.29 (d,  $J$  = 8.4 Hz, 1H, Ar-H), 7.55 (s, 1H, Ar-H), 7.47 (d,  $J$  = 7.6 Hz, 1H, Ar-H), 7.36 (s, 1H, Ar-H), 7.26 (d,  $J$  = 8.4 Hz, 1H, Ar-H), 7.19 (d,  $J$  = 7.6 Hz, 1H, Ar-H).  $^{13}\text{C}$  NMR (100 MHz,  $\text{DMSO-}d_6$ ):  $\delta$  193.6, 164.6, 159.5, 142.0, 137.8, 135.3, 128.6, 126.5, 125.9, 125.1, 124.1, 122.6, 121.7, 121.4, 112.9, 106.9. HRESIMS calcd for  $[\text{C}_{16}\text{H}_8\text{Cl}_2\text{N}_2\text{O} + \text{H}]^+$  315.00919 (100%), 317.00624 (64%), found 315.00980 (100%), 317.00684 (64%).

6,6'-Dimethyl-2,3'-bi(3*H*-indol)-3-one (**9i**)

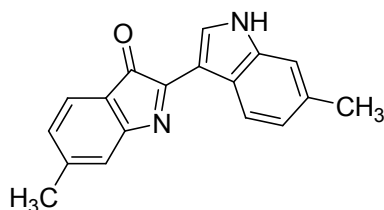

Red amorphous solid. IR (KBr)  $\nu_{\max}$ : 3421, 1721, 1611, 1561, 1415, 1367, 1275, 1122  $\text{cm}^{-1}$ .  $^1\text{H}$  NMR (400 MHz,  $\text{DMSO-}d_6$ ):  $\delta$  12.03 (s, 1H, NH), 8.43 (s, 1H, Ar-H), 8.23 (d,  $J = 8.0$  Hz, 1H, Ar-H), 7.38 (d,  $J = 7.3$  Hz, 1H, Ar-H), 7.31 (s, 1H, Ar-H), 7.15 (s, 1H, Ar-H), 7.08 (d,  $J = 8.0$  Hz, 1H, Ar-H), 6.96 (d,  $J = 7.3$  Hz, 1H, Ar-H), 2.45 (s, 3H,  $\text{CH}_3$ ), 2.42 (s, 3H,  $\text{CH}_3$ ).  $^{13}\text{C}$  NMR (100 MHz,  $\text{DMSO-}d_6$ ):  $\delta$  195.0, 163.9, 158.9, 149.1, 137.7, 133.6, 133.4, 126.8, 124.8, 124.2, 123.9, 122.6, 121.9, 120.6, 112.9, 107.1, 22.4, 21.8. HRESIMS calcd for  $[\text{C}_{18}\text{H}_{14}\text{N}_2\text{O} + \text{H}]^+$  275.11844, found 275.11914.

7,7'-Dichloro-2,3'-bi(3*H*-indol)-3-one (**9j**)

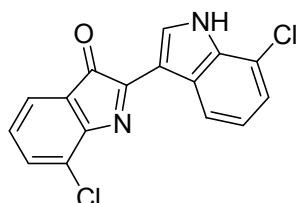

Red solid, mp: 222-224  $^{\circ}\text{C}$  (from EtOAc/PE = 1:4). IR (KBr)  $\nu_{\max}$ : 3417, 1719, 1566, 1412, 1369, 1263, 1125, 1013  $\text{cm}^{-1}$ .  $^1\text{H}$  NMR (400 MHz,  $\text{DMSO-}d_6$ ):  $\delta$  12.61 (s, 1H, NH), 8.42 (s, 1H, Ar-H), 8.35 (d,  $J = 7.8$  Hz, 1H, Ar-H), 7.58 (d,  $J = 7.8$  Hz, 1H, Ar-H), 7.44 (d,  $J = 7.2$  Hz, 1H, Ar-H), 7.35 (d,  $J = 7.6$  Hz, 1H, Ar-H), 7.27 (t,  $J = 7.8$  Hz, 1H, Ar-H), 7.17 (t,  $J = 7.2$  Hz, 1H, Ar-H).  $^{13}\text{C}$  NMR (100 MHz,  $\text{DMSO-}d_6$ ):  $\delta$  194.0, 158.7, 137.5, 134.6, 134.2, 128.4, 128.3, 128.2, 125.5, 125.1, 123.7, 123.6, 123.5, 121.9, 117.4, 108.0. HRESIMS calcd for  $[\text{C}_{16}\text{H}_8\text{Cl}_2\text{N}_2\text{O} + \text{H}]^+$  315.00919 (100%), 317.00624 (64%), found 315.01022 (100%), 317.00720 (64%).

7,7'-Dibromo-2,3'-bi(3*H*-indol)-3-one (**9k**)

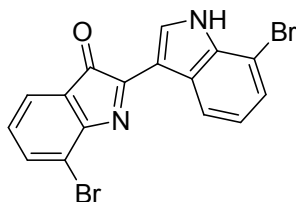

Red solid, mp: 224-226  $^{\circ}\text{C}$  (from EtOAc/PE = 1:4). IR (KBr)  $\nu_{\max}$ : 3418, 1717, 1563, 1430, 1368, 1261, 1114, 1048  $\text{cm}^{-1}$ .  $^1\text{H}$  NMR (400 MHz,  $\text{DMSO-}d_6$ ):  $\delta$  12.44 (s, 1H, NH), 8.41 (s, 1H, Ar-H), 8.40 (d,  $J = 7.0$  Hz, 1H, Ar-H), 7.71 (d,  $J = 7.8$  Hz, 1H, Ar-H), 7.49 (d,  $J = 7.6$  Hz, 1H, Ar-H), 7.46 (d,  $J = 7.0$  Hz, 1H, Ar-H), 7.21 (t,  $J = 7.8$  Hz, 1H, Ar-H), 7.09 (t,  $J = 7.6$  Hz, 1H, Ar-H).  $^{13}\text{C}$  NMR (100 MHz,  $\text{DMSO-}d_6$ ):  $\delta$  194.3, 160.4, 158.8, 140.2, 135.8, 134.6, 128.7, 128.0, 126.8, 125.2, 123.9, 123.8, 122.4, 115.3, 108.0, 105.6. HRESIMS calcd for  $[\text{C}_{16}\text{H}_8\text{Br}_2\text{N}_2\text{O} + \text{H}]^+$  402.90816 (51%), 404.90612 (100%), found 402.90848 (51%), 404.90631 (100%).

7,7'-Dimethyl-2,3'-bi(3*H*-indol)-3-one (**9l**)

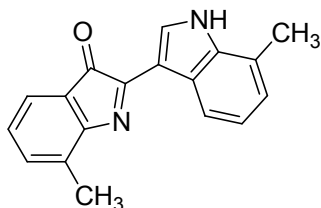

Red solid, mp: 208-209  $^{\circ}\text{C}$  (from EtOAc/PE = 1:4). IR (KBr)  $\nu_{\max}$ : 3378, 1707, 1623, 1567, 1441, 1373, 1241, 1129  $\text{cm}^{-1}$ .  $^1\text{H}$  NMR (400 MHz,  $\text{DMSO-}d_6$ ):  $\delta$  12.12 (s, 1H, NH), 8.41 (d,  $J = 3.0$  Hz,

1H, Ar-H), 8.28 (d,  $J = 7.6$  Hz, 1H, Ar-H), 7.37 (d,  $J = 7.6$  Hz, 1H, Ar-H), 7.30 (d,  $J = 6.9$  Hz, 1H, Ar-H), 7.16 (t,  $J = 7.6$  Hz, 1H, Ar-H), 7.06 (d,  $J = 7.6$  Hz, 1H, Ar-H), 7.04 (t,  $J = 6.9$  Hz, 1H, Ar-H), 2.51 (s, 3H, CH<sub>3</sub>), 2.42 (s, 3H, CH<sub>3</sub>). <sup>13</sup>C NMR (100 MHz, DMSO-*d*<sub>6</sub>):  $\delta$  196.2, 161.1, 157.6, 139.1, 136.7, 132.8, 130.3, 126.4, 126.3, 124.5, 122.6, 122.4, 122.3, 122.2, 120.7, 107.6, 17.1, 15.3. HRESIMS calcd for [C<sub>18</sub>H<sub>14</sub>N<sub>2</sub>O + H]<sup>+</sup> 275.11844, found 275.11698.

7,7'-Dimethoxy-2,3'-bi(3*H*-indol)-3-one (**9m**)

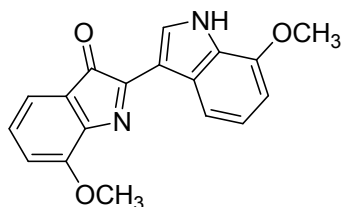

Red solid, mp: 179-181 °C (from EtOAc/PE = 1:4). IR (KBr)  $\nu_{\text{max}}$ : 3348, 1726, 1622, 1561, 1442, 1371, 1263, 1129, 1069 cm<sup>-1</sup>. <sup>1</sup>H NMR (400 MHz, DMSO-*d*<sub>6</sub>):  $\delta$  12.29 (s, 1H, NH), 8.29 (s, 1H, Ar-H), 7.95 (d,  $J = 7.9$  Hz, 1H, Ar-H), 7.25 (dt,  $J = 3.5, 2.3$  Hz, 1H, Ar-H), 7.18 (t,  $J = 7.9$  Hz, 1H, Ar-H), 7.12 (d,  $J = 2.3$  Hz, 1H, Ar-H), 7.11 (t,  $J = 3.5$  Hz, Ar-H), 6.84 (d,  $J = 7.9$  Hz, 1H, Ar-H), 4.02 (s, 3H, OCH<sub>3</sub>), 3.95 (s, 3H, OCH<sub>3</sub>). <sup>13</sup>C NMR (100 MHz, DMSO-*d*<sub>6</sub>):  $\delta$  196.5, 156.6, 150.9, 149.6, 146.9, 132.0, 128.2, 127.9, 127.1, 124.5, 124.0, 123.0, 117.4, 115.5, 107.7, 104.8, 57.5, 55.8. HRESIMS calcd for [C<sub>18</sub>H<sub>14</sub>N<sub>2</sub>O<sub>3</sub> + H]<sup>+</sup> 307.10827, found 307.10628.

7,7'-Bis(benzyloxy)-2,3'-bi(3*H*-indol)-3-one (**9n**)

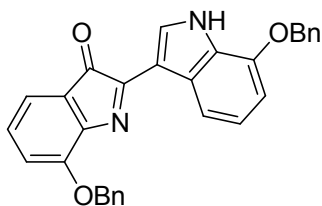

Red solid, mp: 183-185 °C (from EtOAc/PE = 1:4). IR (KBr)  $\nu_{\text{max}}$ : 3438, 1709, 1569, 1429, 1376, 1249, 1116, 1089 cm<sup>-1</sup>. <sup>1</sup>H NMR (400 MHz, DMSO-*d*<sub>6</sub>):  $\delta$  12.31 (s, 1H, NH), 8.32 (s, 1H, Ar-H), 7.94 (d,  $J = 7.7$  Hz, 1H, Ar-H), 7.57 (d,  $J = 6.9$  Hz, 2H, Ar-H), 7.52 (d,  $J = 6.9$  Hz, 2H, Ar-H), 7.44-7.30 (m, 6H, Ar-H), 7.27 (d,  $J = 7.7$  Hz, 1H, Ar-H), 7.14 (d,  $J = 6.0$  Hz, 2H, Ar-H), 7.09 (d,  $J = 7.4$  Hz, 1H, Ar-H), 6.94 (d,  $J = 7.4$  Hz, 1H, Ar-H), 5.51 (s, 2H, OCH<sub>2</sub>), 5.29 (s, 2H, OCH<sub>2</sub>). <sup>13</sup>C NMR (100 MHz, DMSO-*d*<sub>6</sub>):  $\delta$  195.3, 156.6, 149.9, 149.8, 145.9, 137.8, 137.5, 132.3, 129.0, 128.9, 128.5, 128.4, 128.3, 128.2, 128.1, 128.0, 127.3, 126.6, 124.9, 123.0, 118.2, 115.6, 107.7, 106.1, 72.0, 69.9. HRESIMS calcd for [C<sub>30</sub>H<sub>22</sub>N<sub>2</sub>O<sub>3</sub> + H]<sup>+</sup> 459.17087, found 459.17139.

3-Oxo-2,3'-bi(3*H*-indole)-4,4'-dicyanitrile (**9o**)

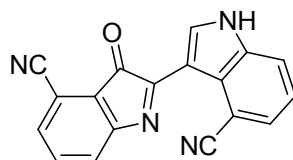

Brown amorphous solid. IR (KBr)  $\nu_{\text{max}}$ : 3413, 1729, 1610, 1561, 1421, 1356, 1251, 1129, 1038 cm<sup>-1</sup>. <sup>1</sup>H NMR (400 MHz, DMSO-*d*<sub>6</sub>):  $\delta$  12.73 (s, 1H, NH), 8.61 (s, 1H, Ar-H), 7.89 (dd,  $J = 7.9, 1.0$  Hz, 1H, Ar-H), 7.76 (t,  $J = 7.7$  Hz, 1H, Ar-H), 7.73 (d,  $J = 7.3$  Hz, 1H, Ar-H), 7.63 (d,  $J = 7.3$  Hz, 1H, Ar-H), 7.60 (d,  $J = 7.7$  Hz, 1H, Ar-H), 7.43 (t,  $J = 7.9$  Hz, 1H, Ar-H). <sup>13</sup>C NMR (100 MHz, DMSO-*d*<sub>6</sub>):  $\delta$  191.0, 162.6, 158.0, 138.2, 138.0, 136.7, 130.6, 130.4, 125.8, 124.6, 124.0,

123.8, 119.6, 118.5, 115.6, 106.8, 106.4, 104.8. MS (ESI): 297 (M+H<sup>+</sup>, 100), 319 (M+Na<sup>+</sup>, 15). Anal calcd for C<sub>18</sub>H<sub>8</sub>N<sub>4</sub>O: C, 72.97; H, 2.72; N, 18.91. Found C, 72.75; H, 3.02; N, 18.69.  
Dimethyl 3-oxo-2,3'-bi(3*H*-indole)-6,6'-dicarboxylate (**9p**)

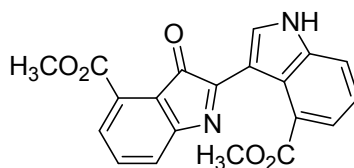

Red solid, mp: 177-179 °C (from EtOAc/PE = 1:1). IR (KBr)  $\nu_{\text{max}}$ : 3306, 1728, 1561, 1428, 1355, 1279, 1139, 1022 cm<sup>-1</sup>. <sup>1</sup>H NMR (400 MHz, DMSO-*d*<sub>6</sub>):  $\delta$  12.43 (s, 1H, NH), 8.35 (d, *J* = 3.0 Hz, 1H, Ar-H), 7.72 (d, *J* = 8.0 Hz, 1H, Ar-H), 7.68 (d, *J* = 7.7 Hz, 1H, Ar-H), 7.50 (d, *J* = 7.4 Hz, 1H, Ar-H), 7.45 (d, *J* = 7.4 Hz, 2H, Ar-H), 7.33 (t, *J* = 7.7 Hz, 1H, Ar-H), 3.87 (s, 3H, OCH<sub>3</sub>), 2.72 (s, 3H, OCH<sub>3</sub>). <sup>13</sup>C NMR (100 MHz, DMSO-*d*<sub>6</sub>):  $\delta$  191.5, 169.3, 166.0, 162.9, 159.6, 138.1, 137.6, 134.6, 130.0, 126.9, 126.6, 124.1, 123.0, 122.8, 122.7, 120.4, 116.2, 106.9, 52.9, 52.3. HRESIMS calcd for [C<sub>20</sub>H<sub>14</sub>N<sub>2</sub>O<sub>5</sub> - H]<sup>+</sup> 361.08245, found 361.08298.

7-Methyl-2-(7-methyl-1*H*-indol-3-yl)indolin-3-one (**13**)

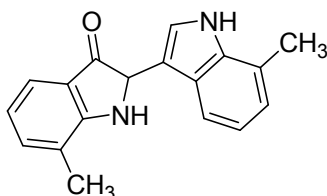

White amorphous solid. IR (KBr)  $\nu_{\text{max}}$ : 3375, 1716, 1620, 1569, 1236, 1125 cm<sup>-1</sup>. <sup>1</sup>H NMR (400 MHz, DMSO-*d*<sub>6</sub>):  $\delta$  12.13 (s, 1H, NH), 7.72 (s, 1H, Ar-H), 7.60 (s, 1H, Ar-H), 7.21 (s, 1H, Ar-H), 7.12 (d, *J* = 6.3 Hz, 1H, Ar-H), 6.99 (s, 1H, Ar-H), 6.81 (s, 1H, Ar-H), 6.60 (d, *J* = 6.3 Hz, 1H, Ar-H), 5.93 (s, 2H), 3.94 (s, 3H, CH<sub>3</sub>), 3.83 (s, 3H, CH<sub>3</sub>). <sup>13</sup>C NMR (100 MHz, DMSO-*d*<sub>6</sub>):  $\delta$  192.1, 147.4, 146.7, 139.6, 133.9, 128.4, 127.0, 123.7, 122.7, 121.4, 117.2, 114.6, 114.5, 114.4, 113.0, 104.0, 56.2, 55.8. MS (ESI): 277 (M+H<sup>+</sup>, 100). Anal calcd for C<sub>18</sub>H<sub>16</sub>N<sub>2</sub>O: C, 78.24; H, 5.84; N, 10.14. Found C, 77.89; H, 6.07; N, 9.83.

### 3. Copies of <sup>1</sup>H, <sup>13</sup>C Spectra

### <sup>1</sup>H and <sup>13</sup>C NMR Spectra for **9a**

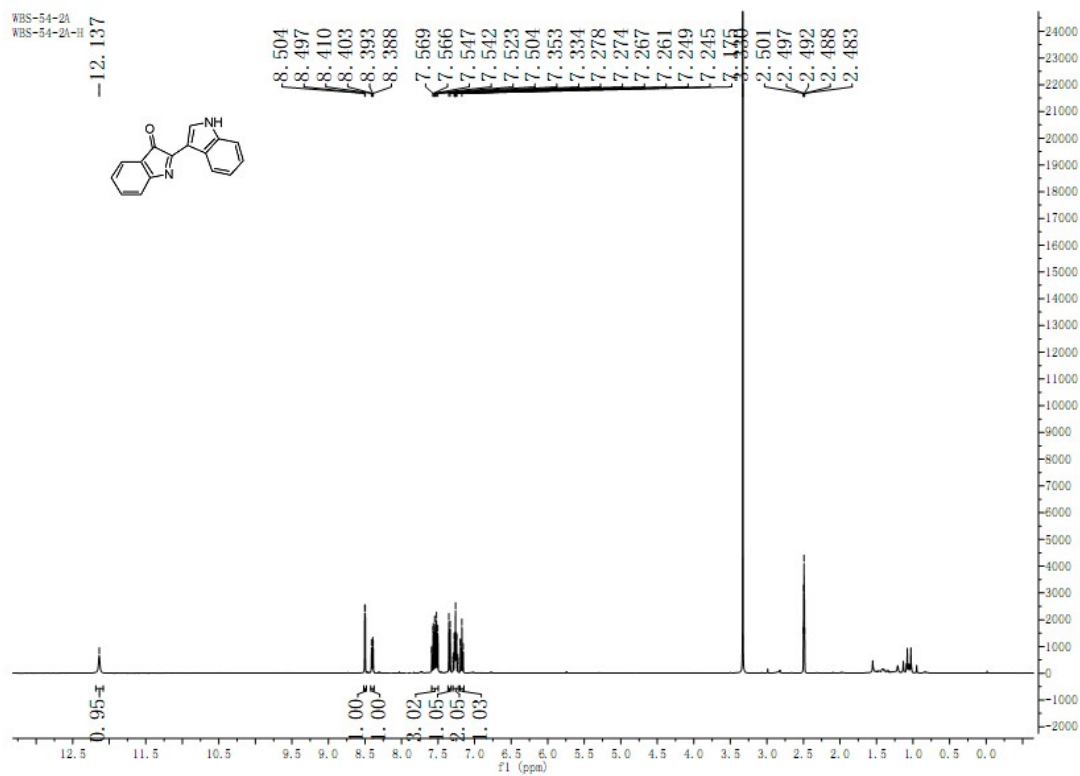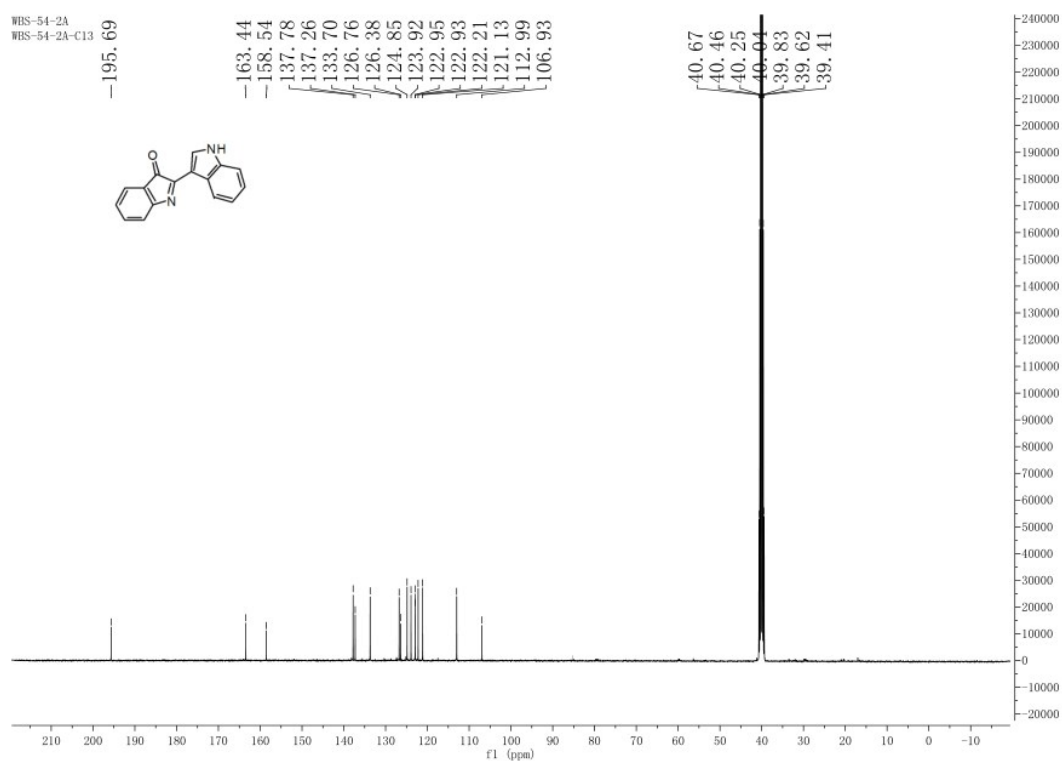

### <sup>1</sup>H and <sup>13</sup>C NMR Spectra for **9b**



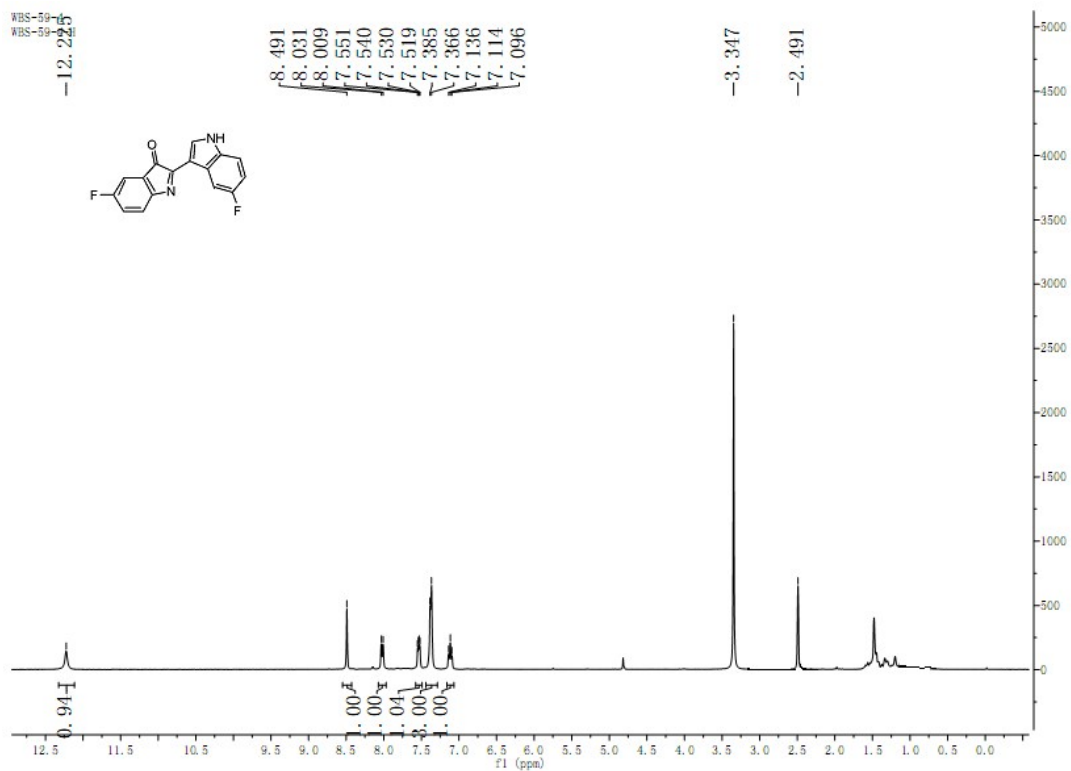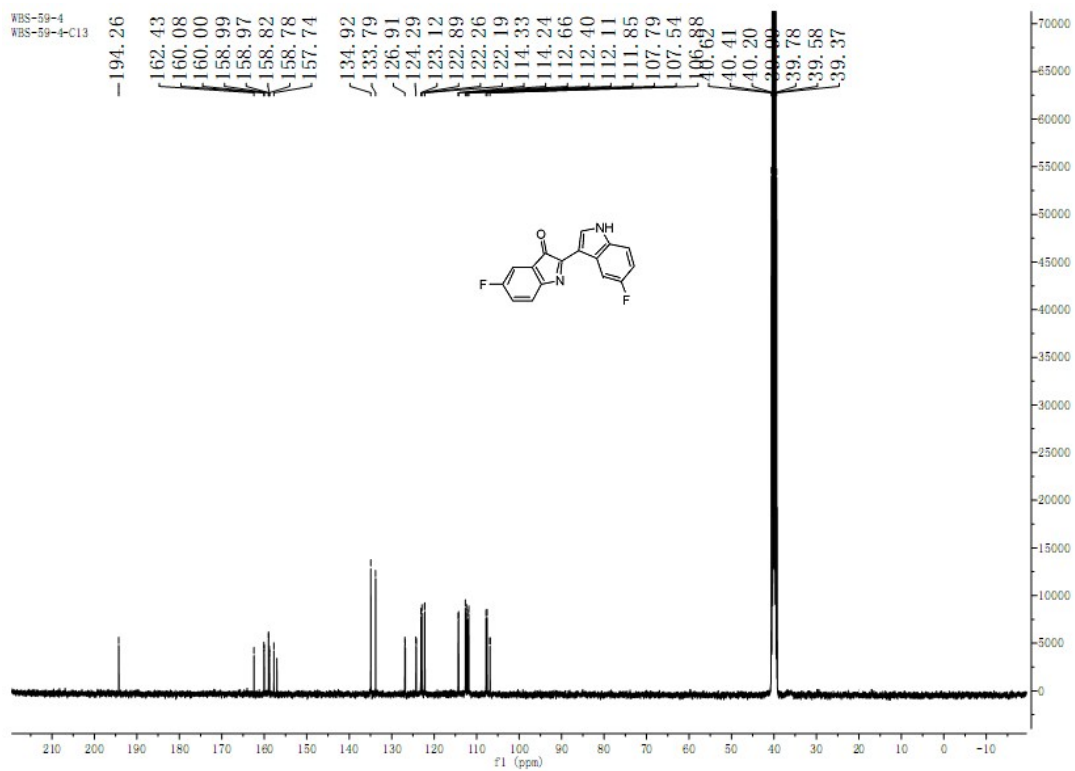

$^1\text{H}$  and  $^{13}\text{C}$  NMR Spectra for **9c**

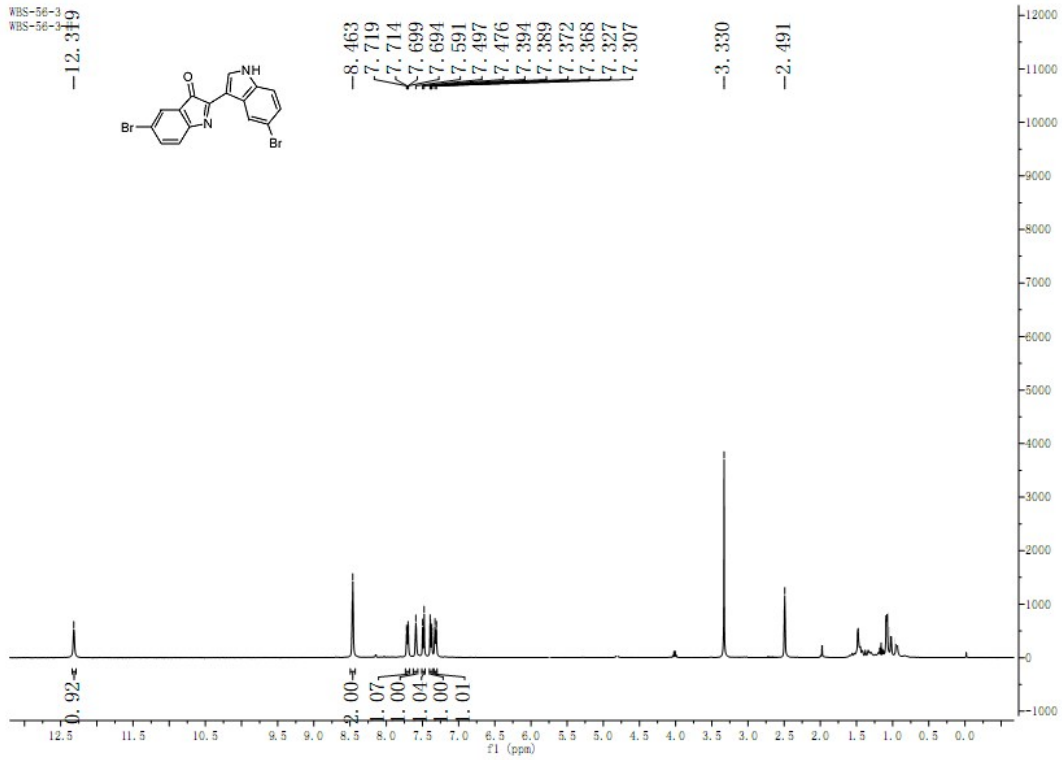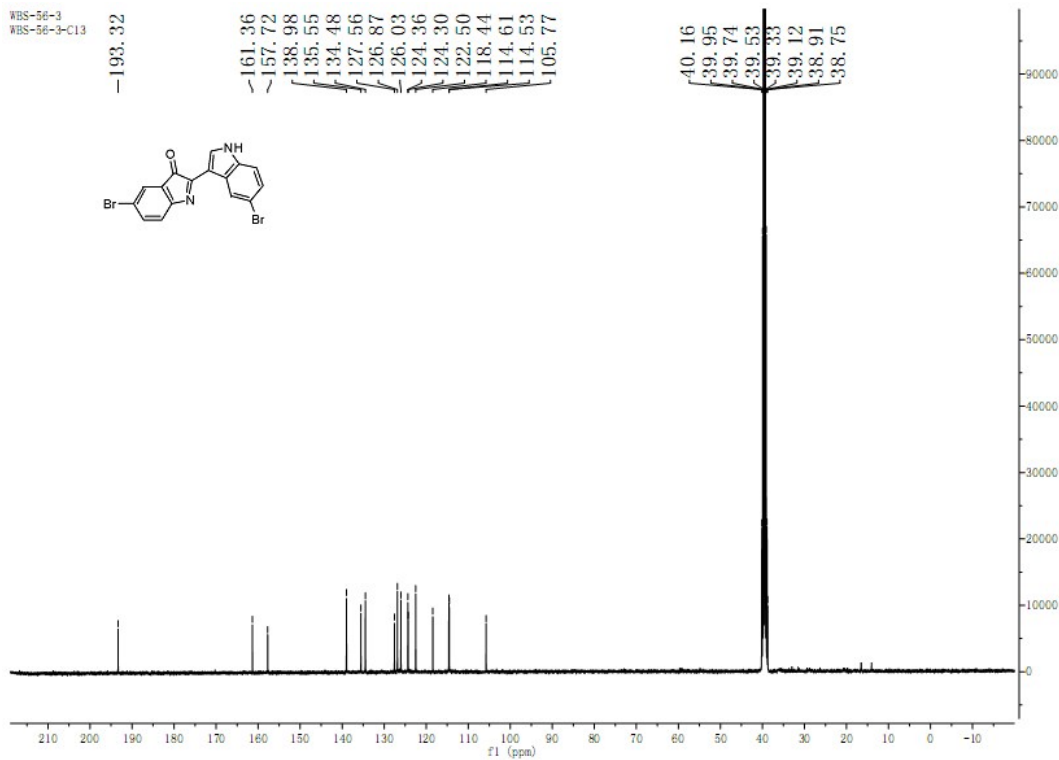

$^1\text{H}$  and  $^{13}\text{C}$  NMR Spectra for **9d**

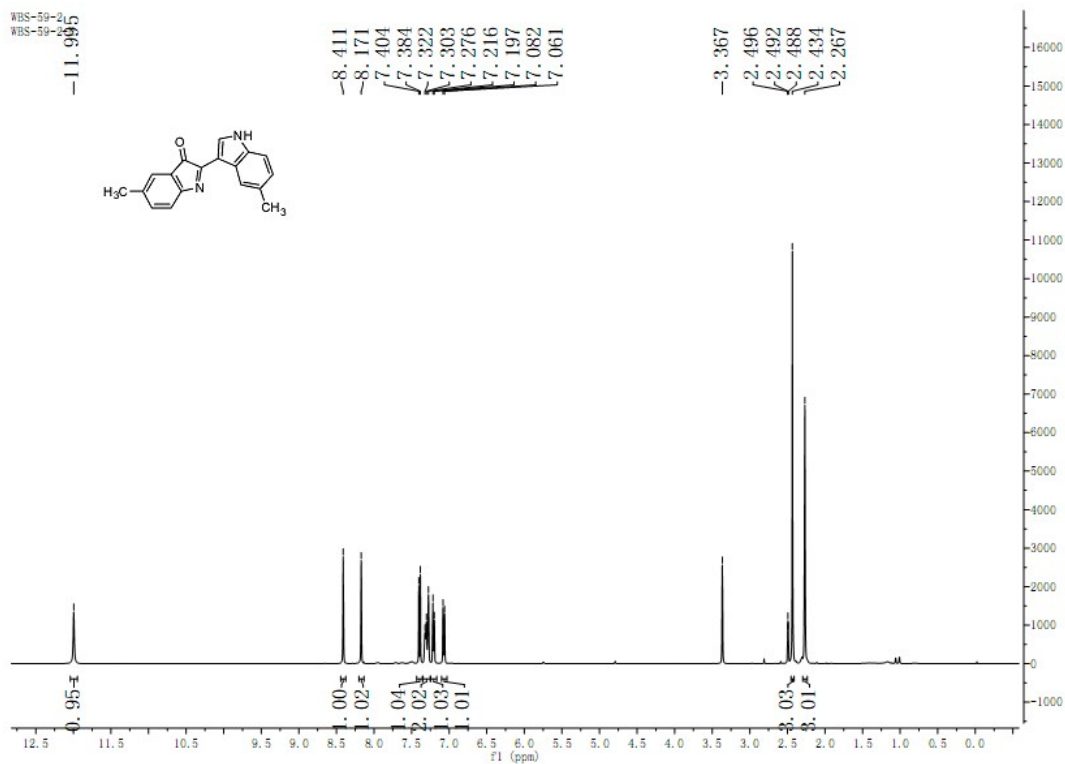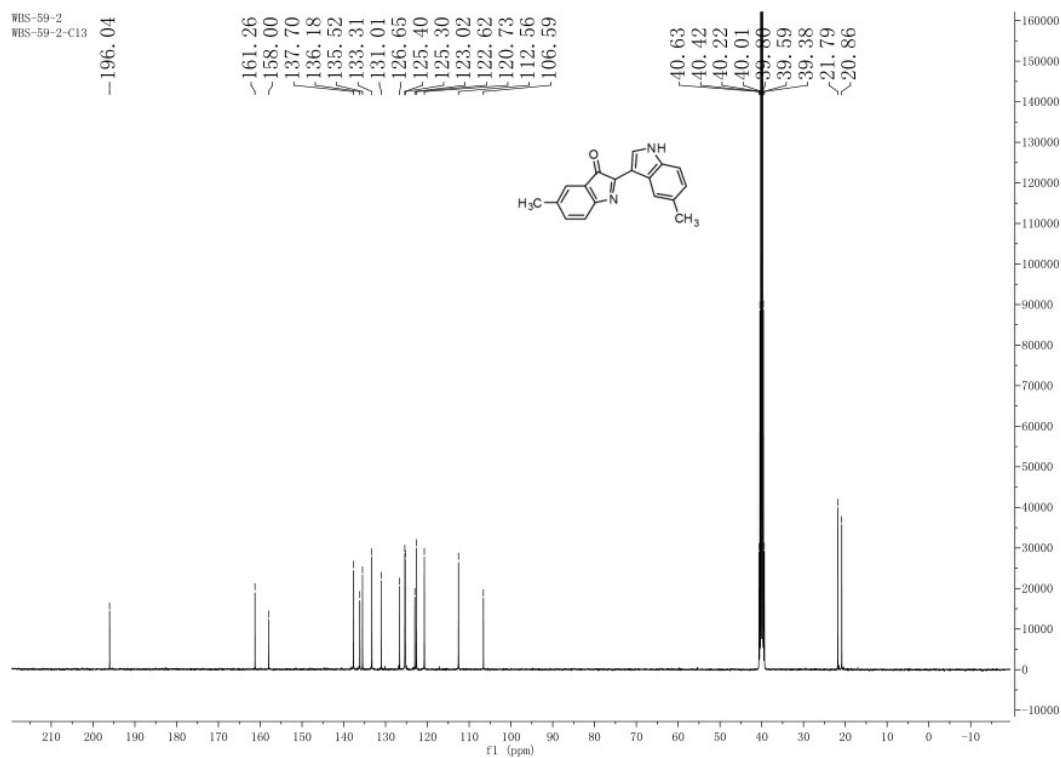

$^1\text{H}$  and  $^{13}\text{C}$  NMR Spectra for **9e**



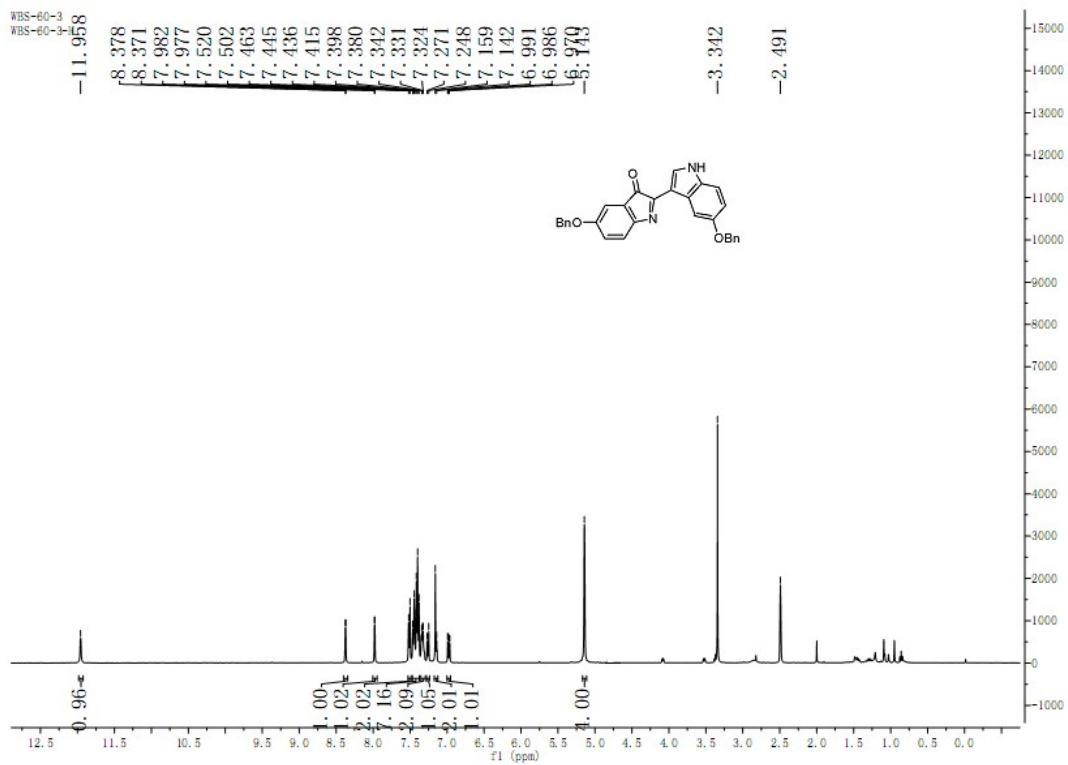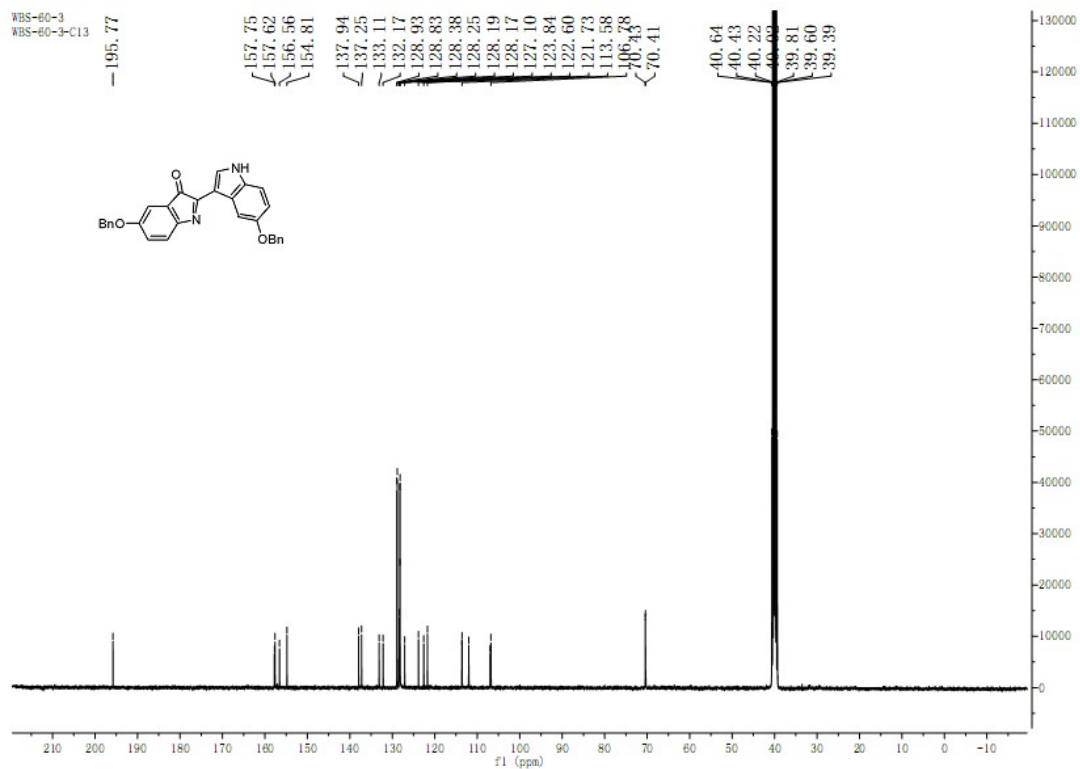

<sup>1</sup>H and <sup>13</sup>C NMR Spectra for 9g

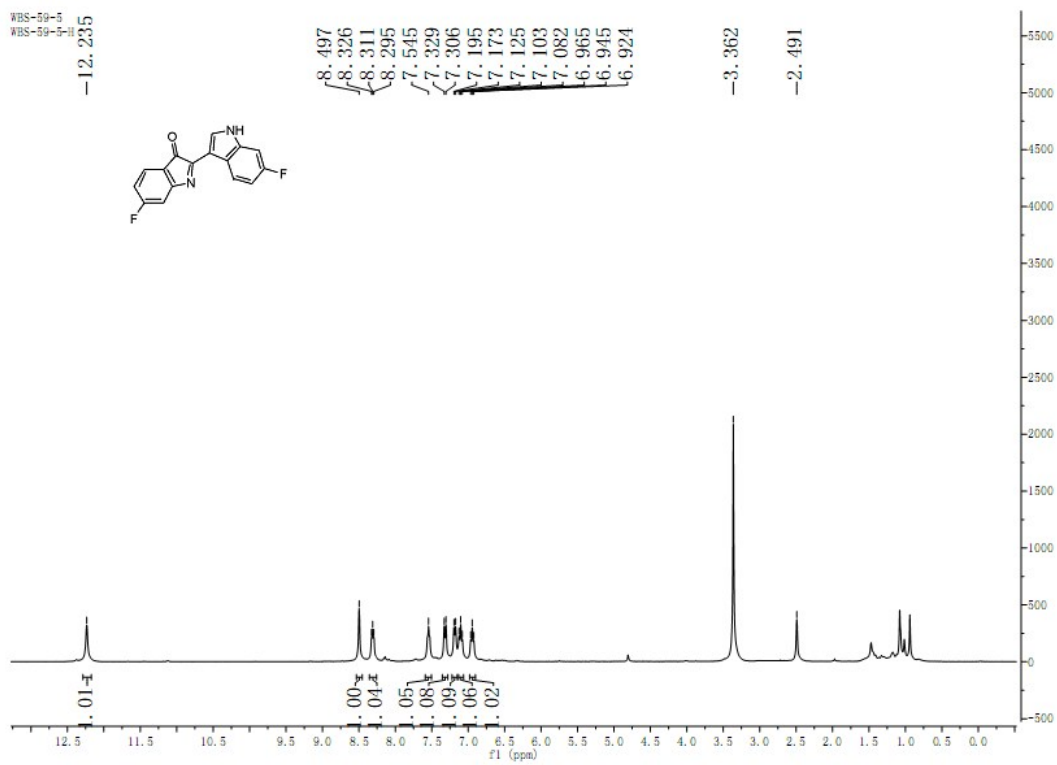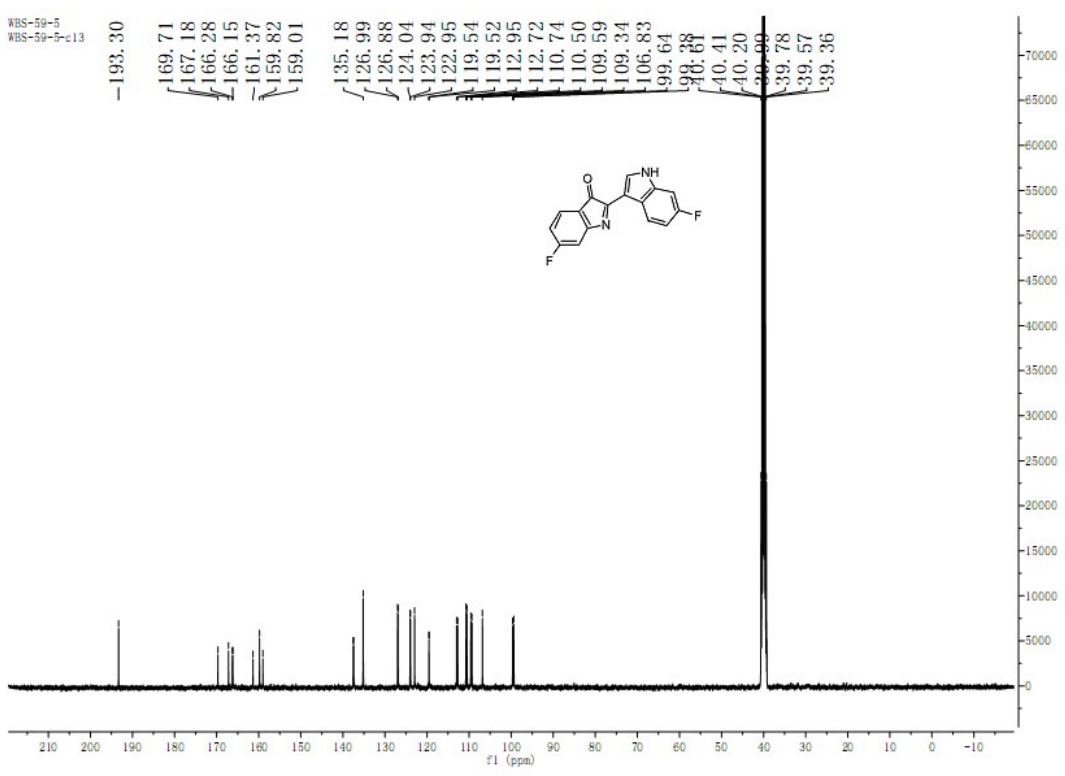

<sup>1</sup>H and <sup>13</sup>C NMR Spectra for **9h**

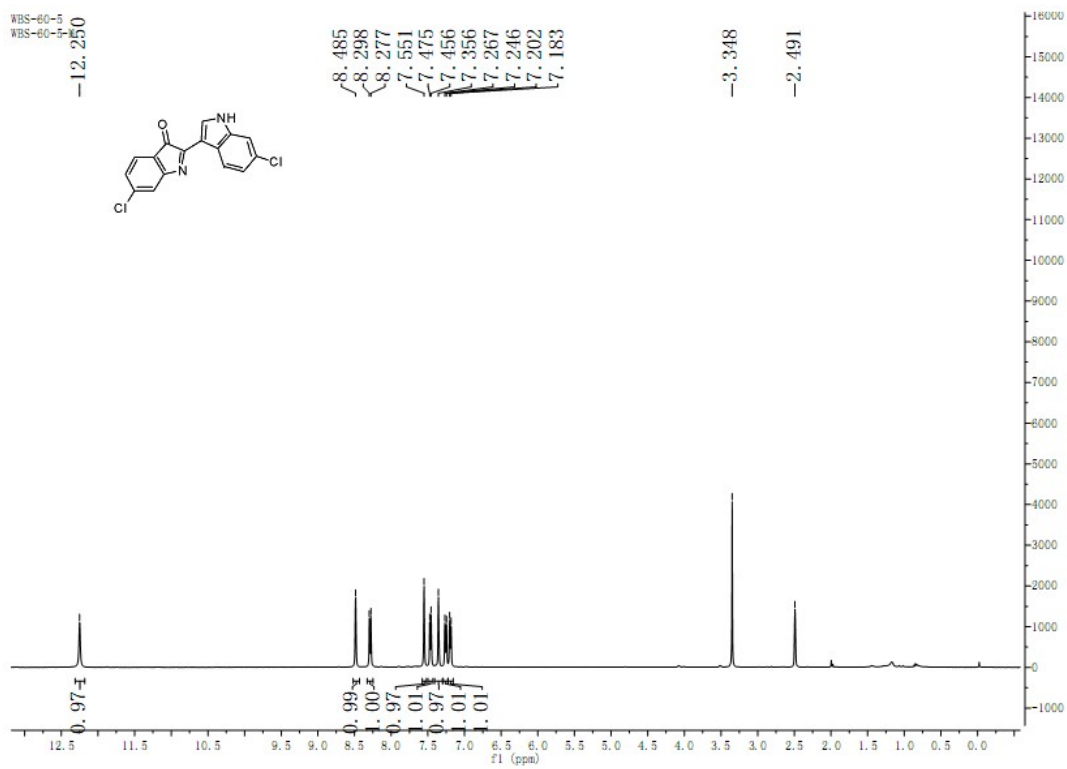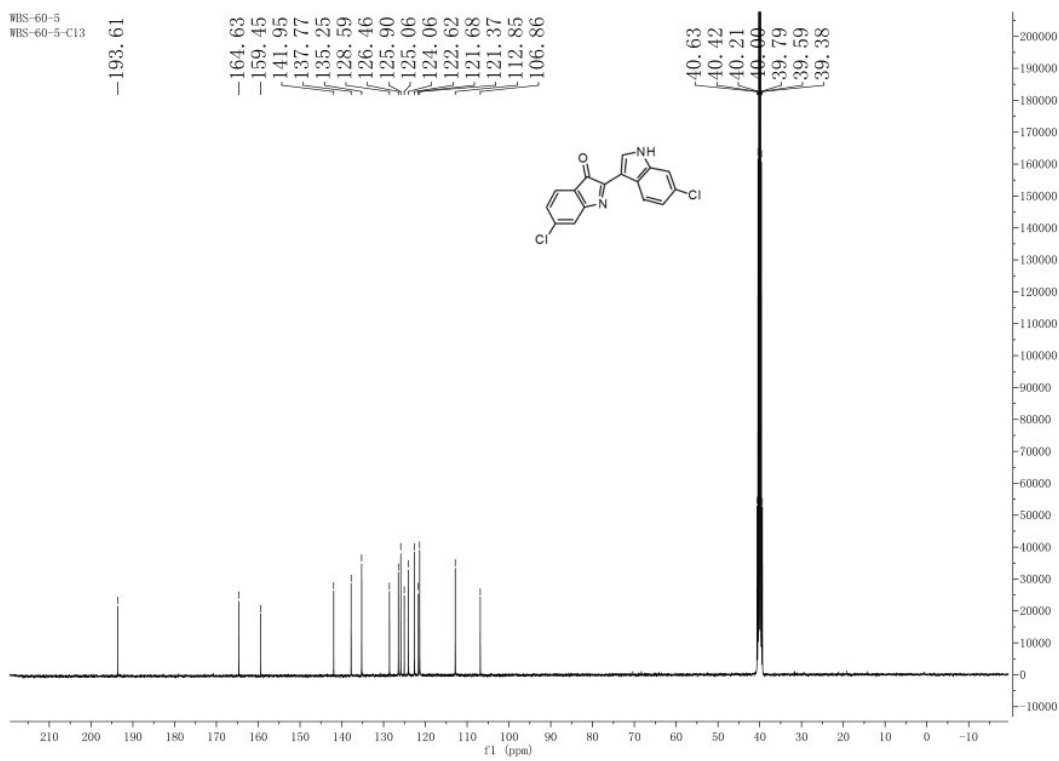

$^1\text{H}$  and  $^{13}\text{C}$  NMR Spectra for **9i**

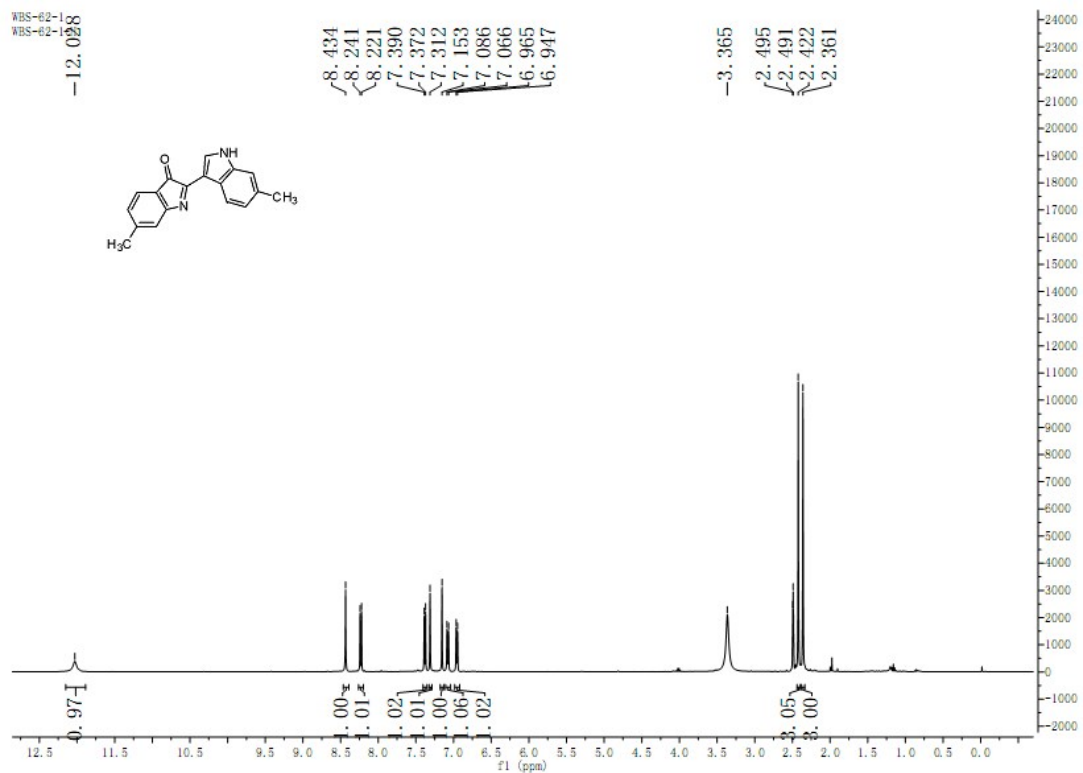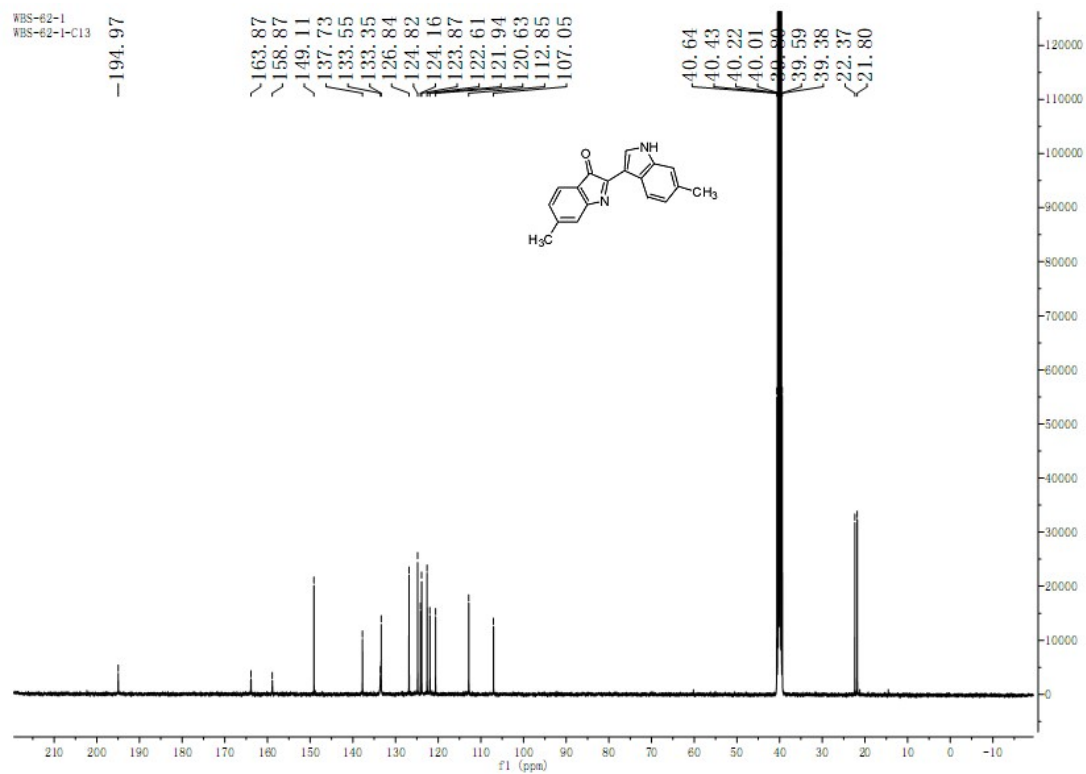

$^1\text{H}$  and  $^{13}\text{C}$  NMR Spectra for 9j



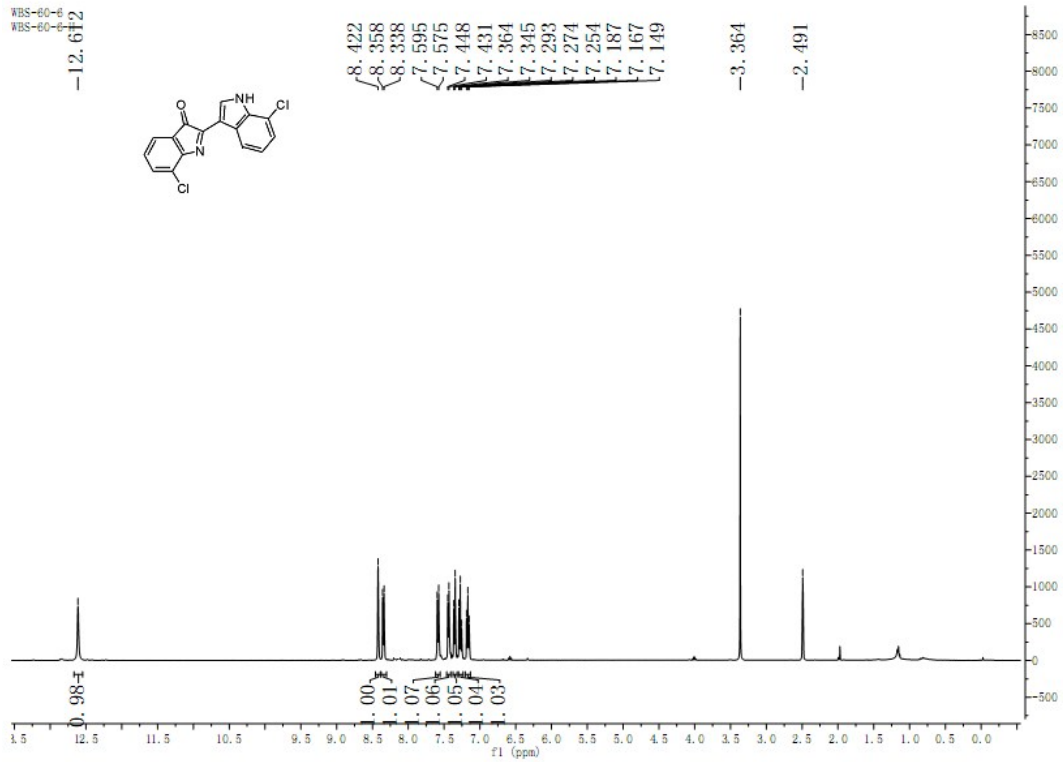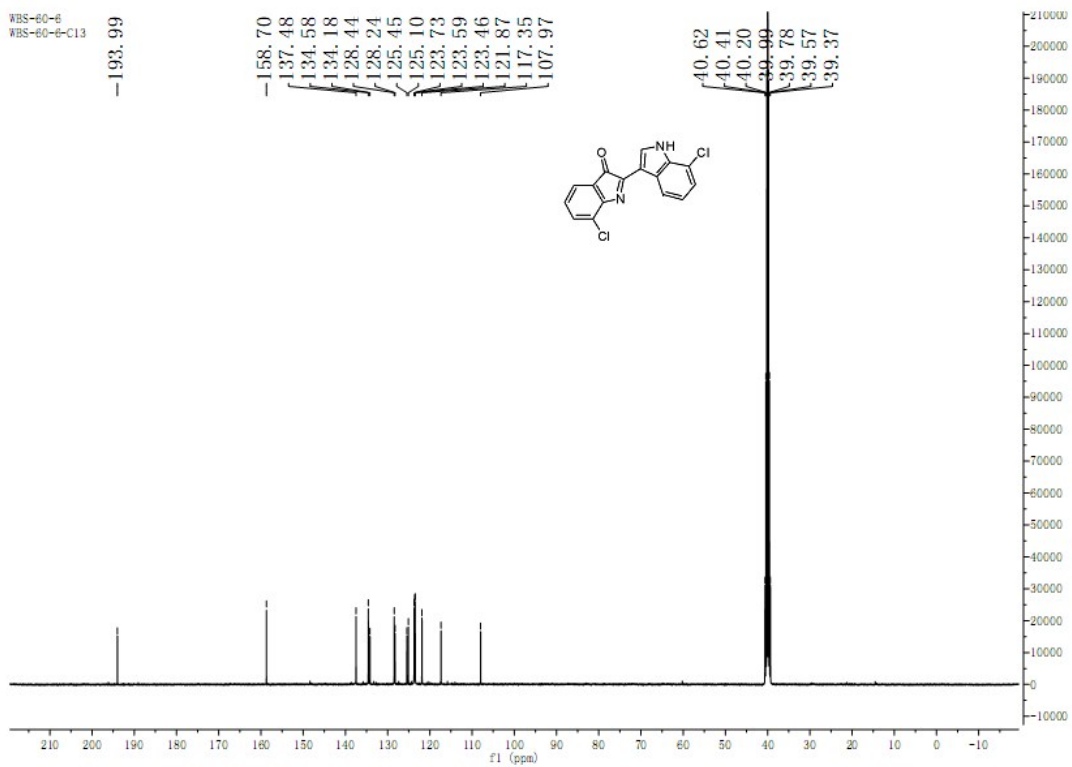

$^1\text{H}$  and  $^{13}\text{C}$  NMR Spectra for **9k**

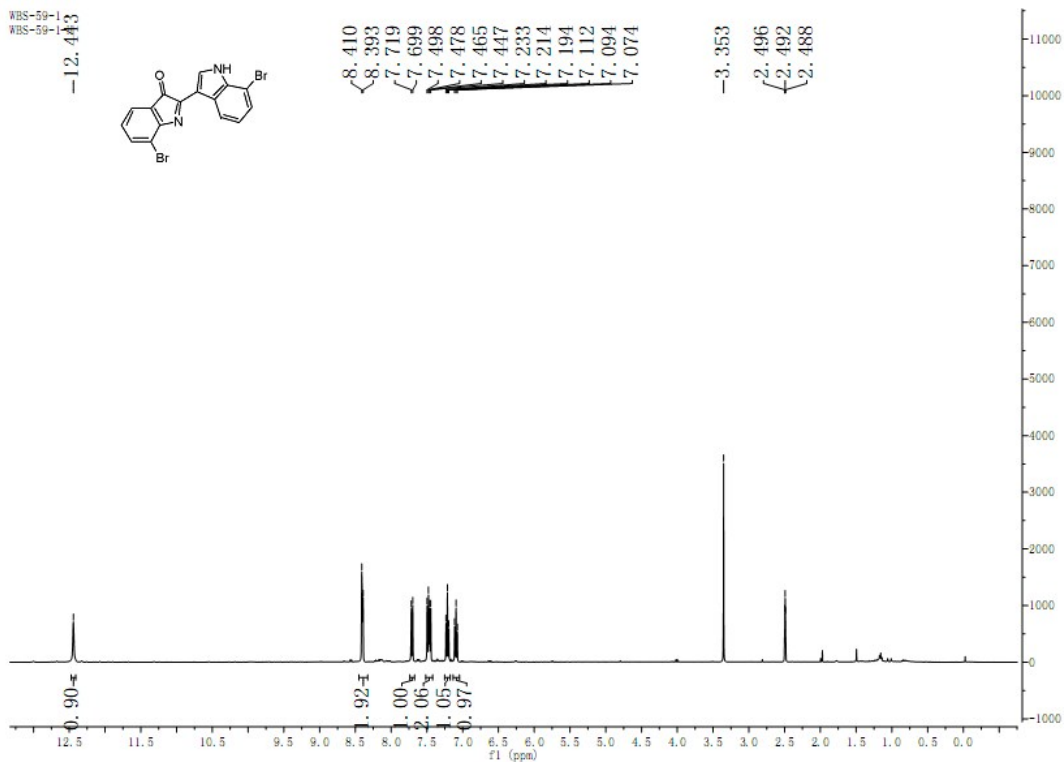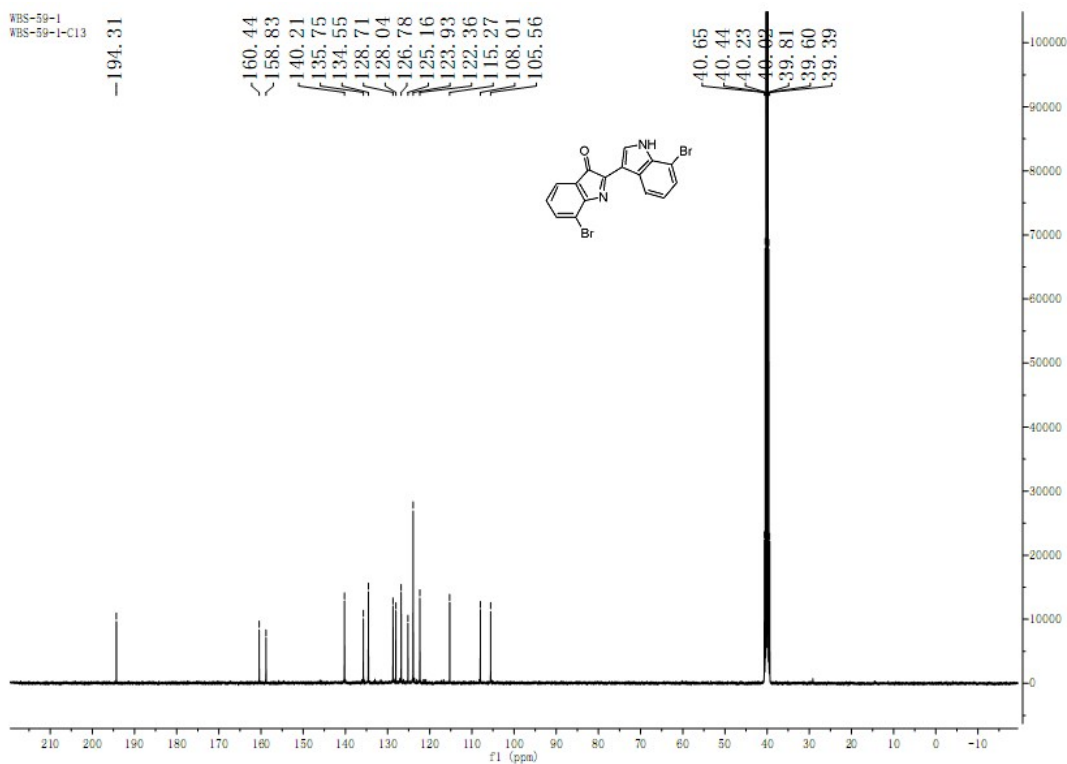

$^1\text{H}$  and  $^{13}\text{C}$  NMR Spectra for **91**

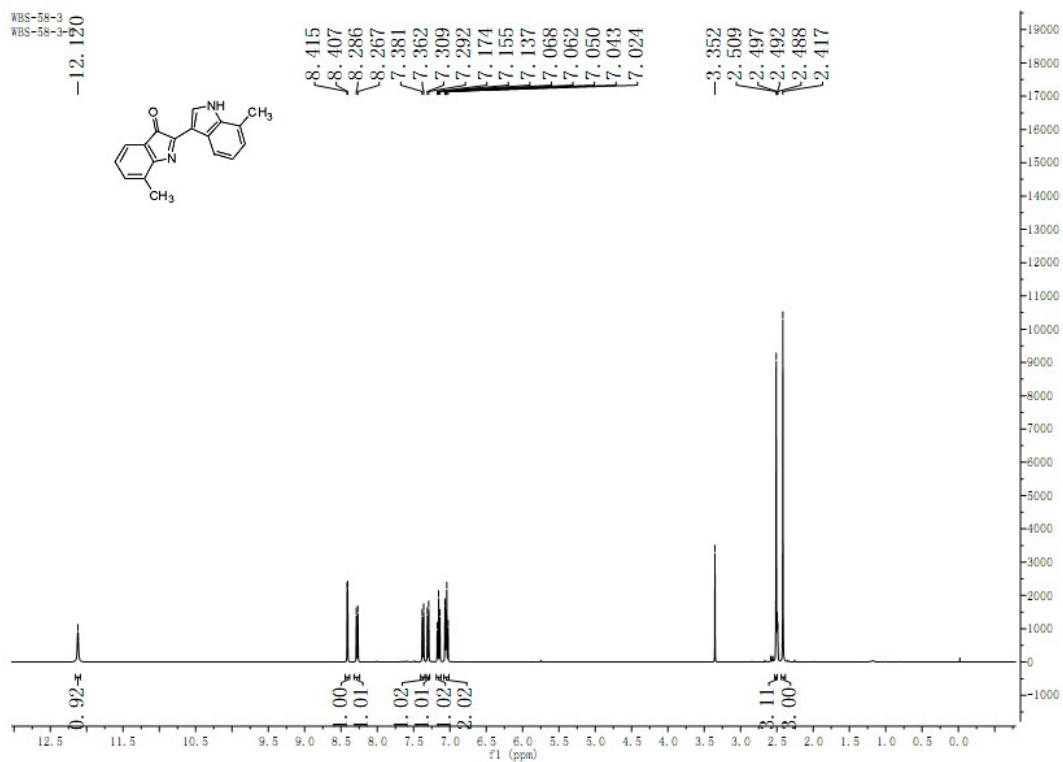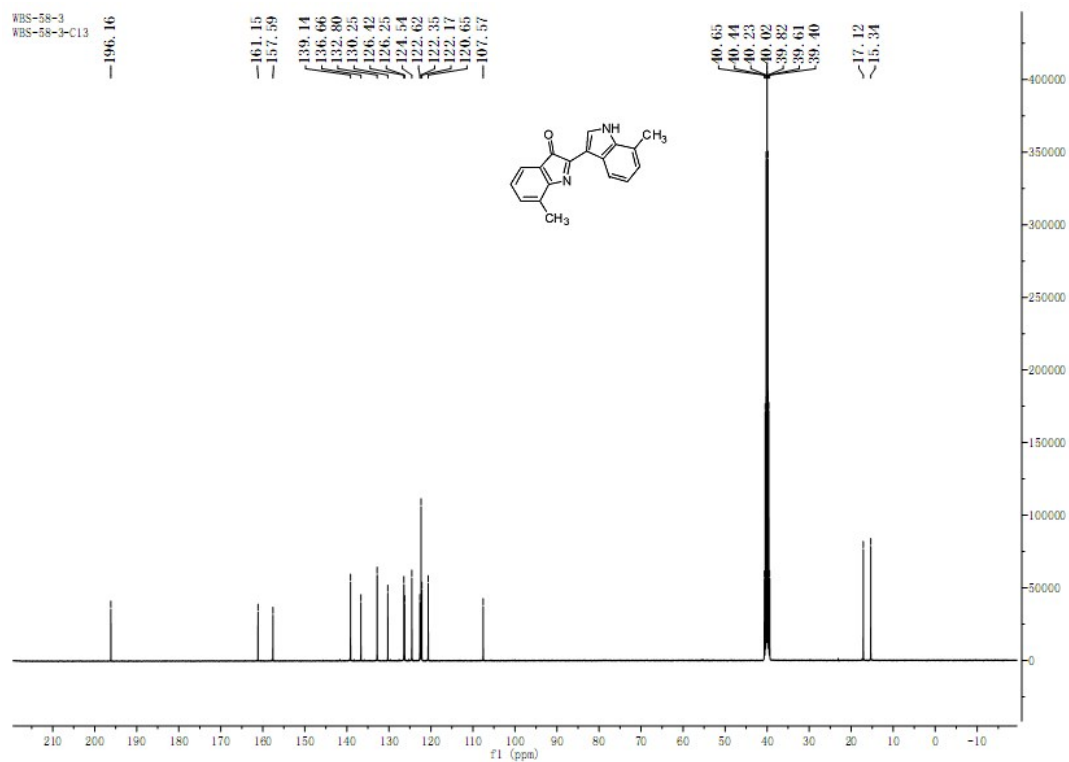

$^1\text{H}$  and  $^{13}\text{C}$  NMR Spectra for **9m**

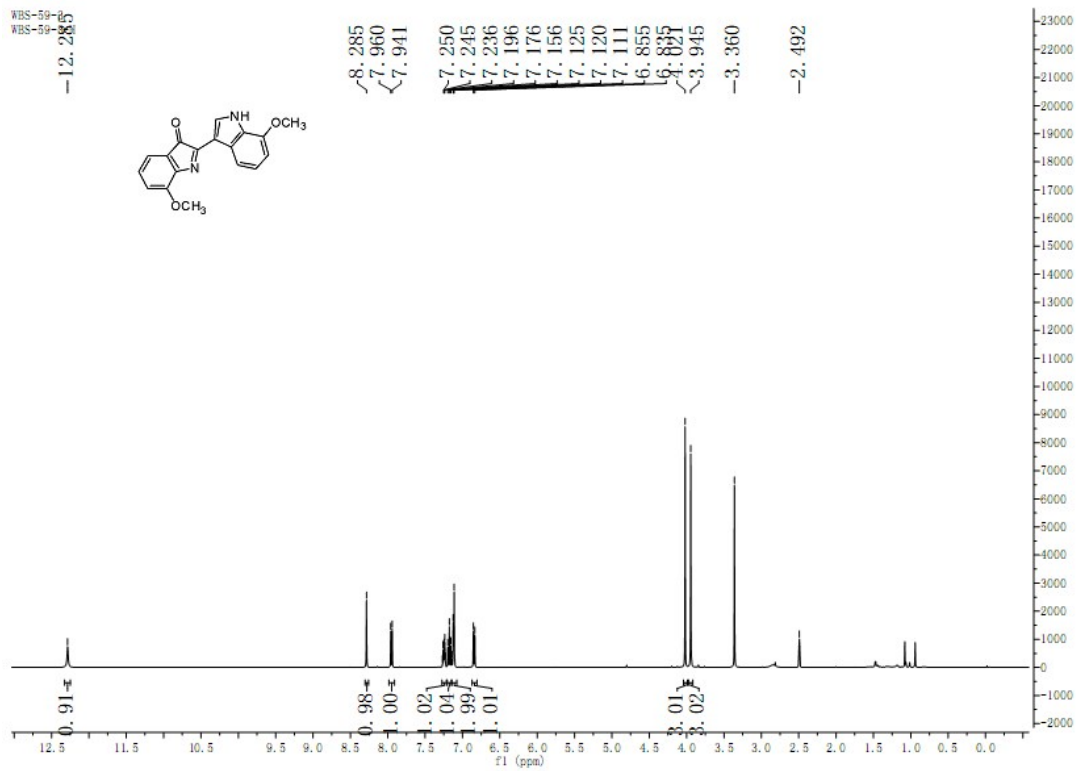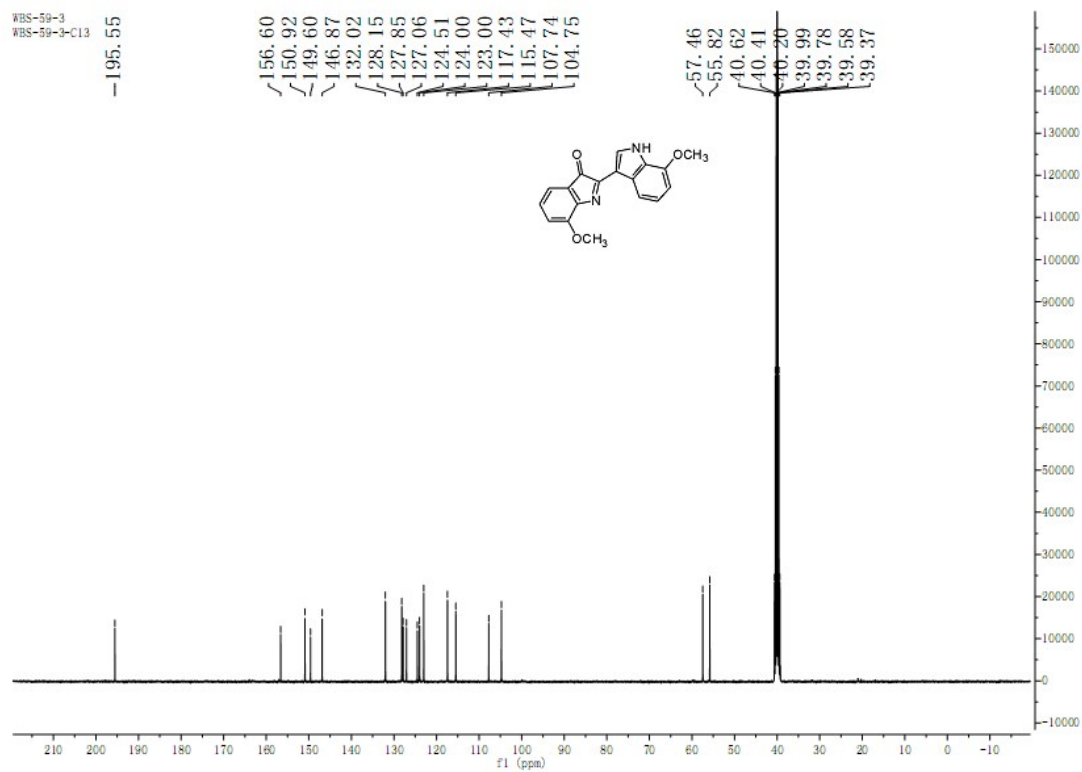

<sup>1</sup>H and <sup>13</sup>C NMR Spectra for **9n**

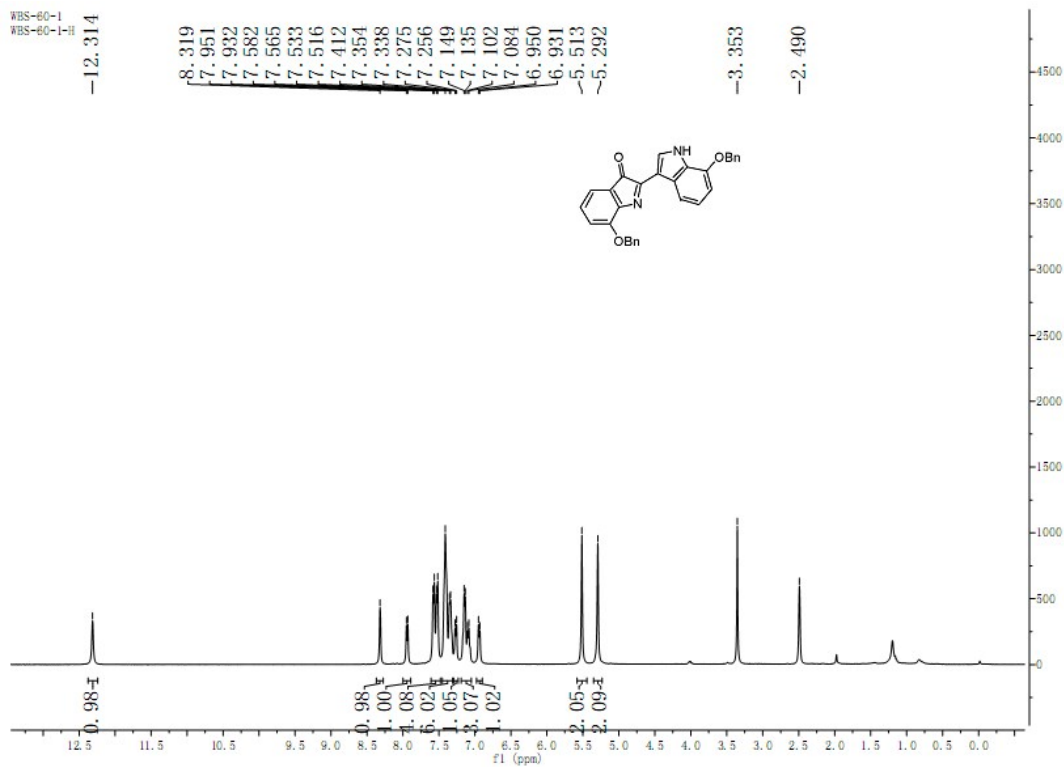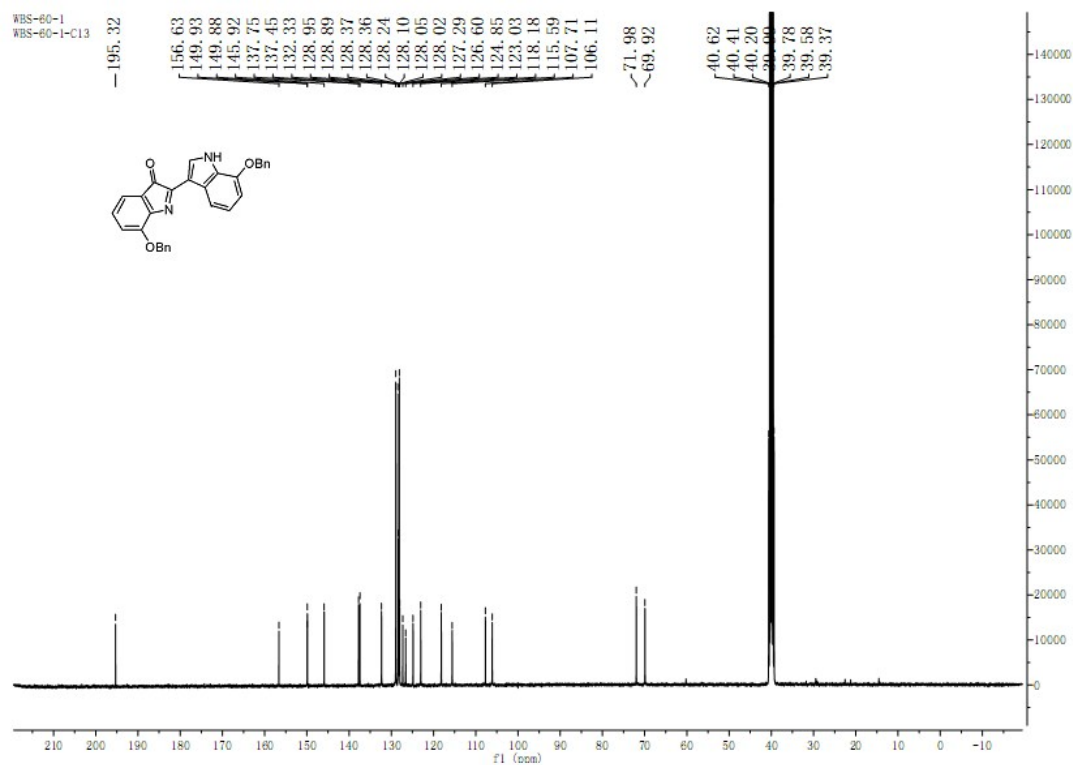

$^1\text{H}$  and  $^{13}\text{C}$  NMR Spectra for **9o**

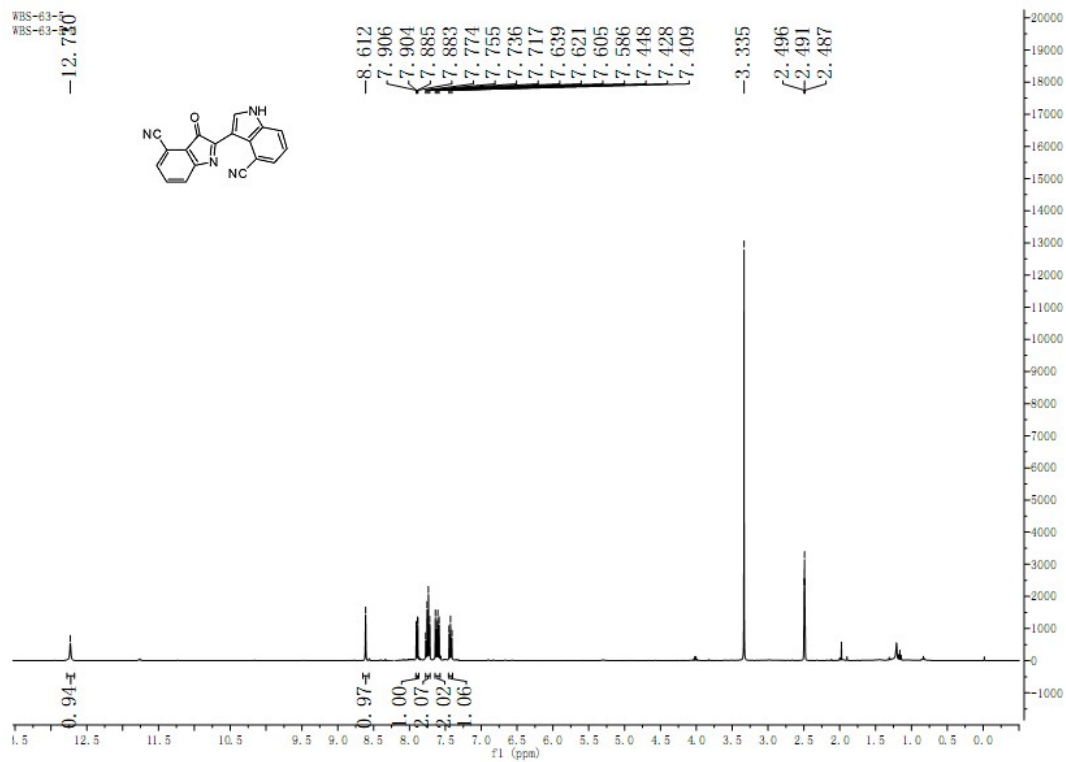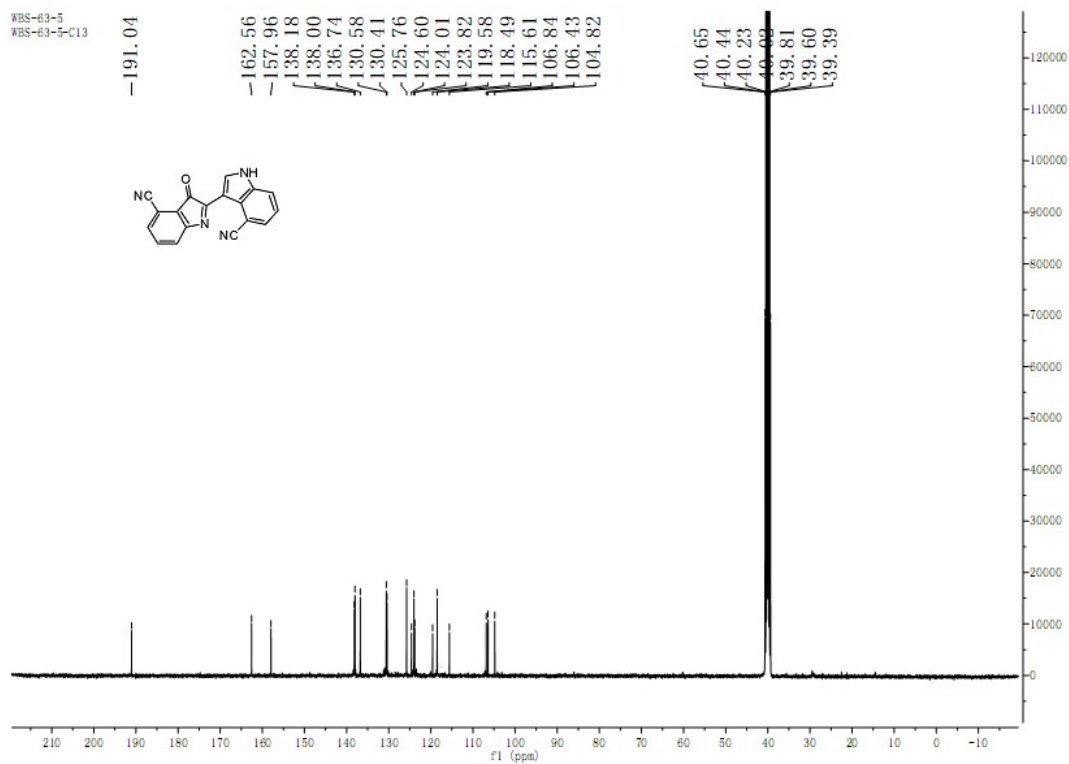

$^1\text{H}$  and  $^{13}\text{C}$  NMR Spectra for **9p**

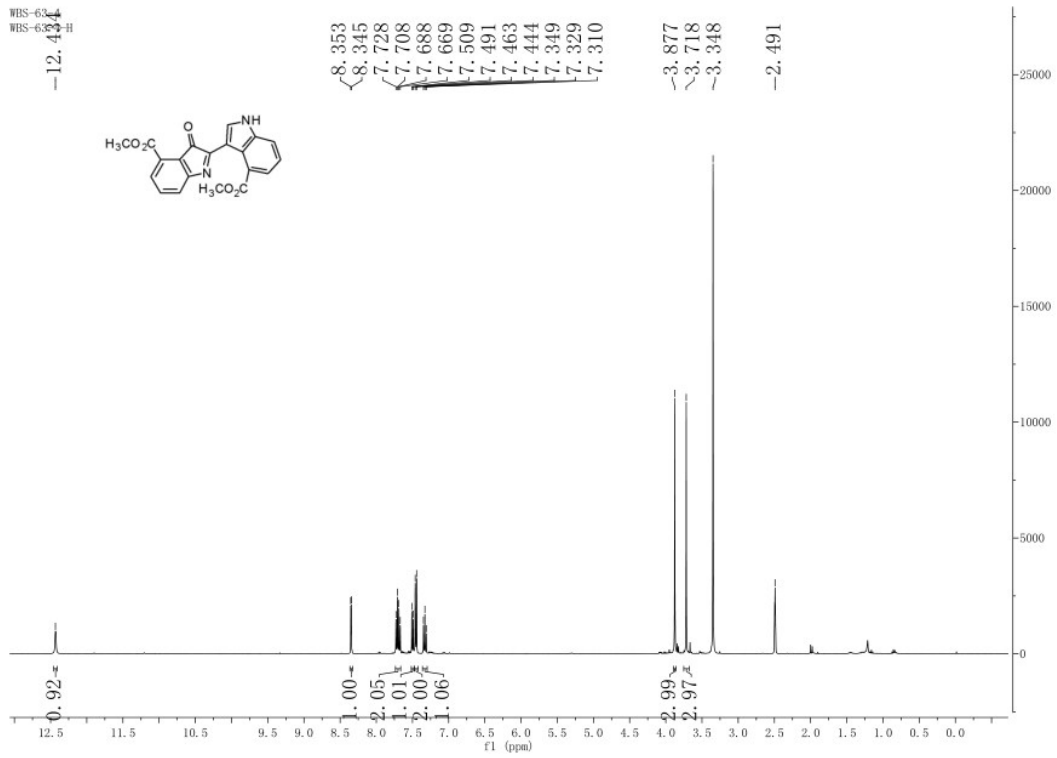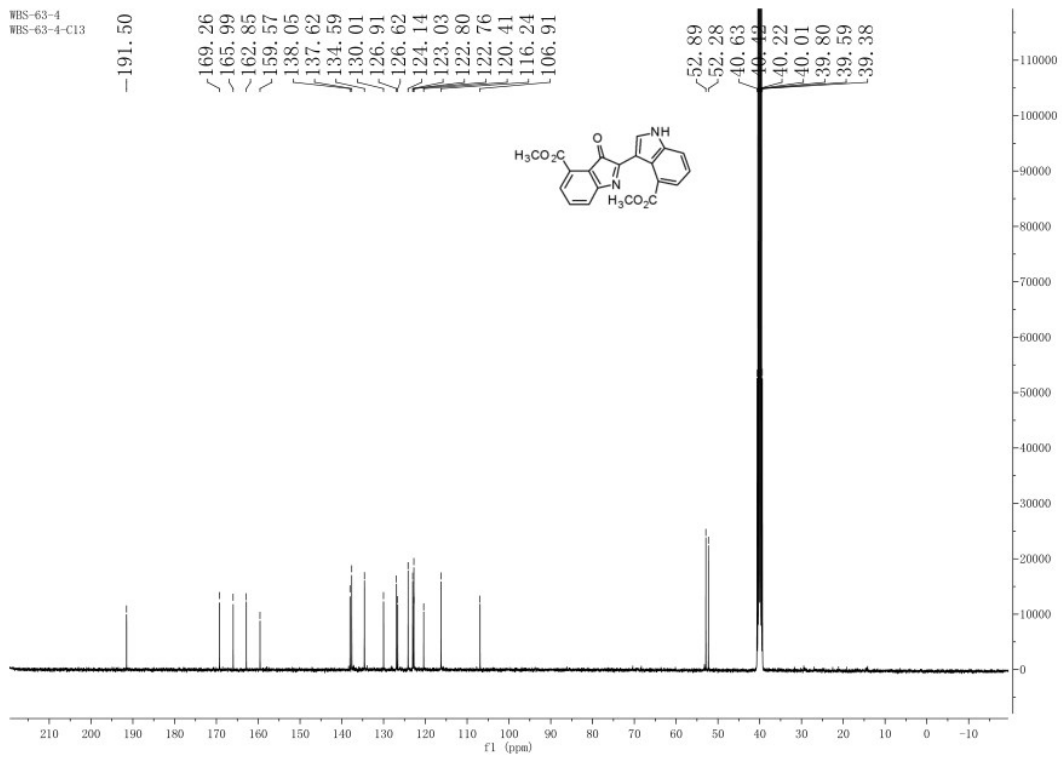

$^1\text{H}$  and  $^{13}\text{C}$  NMR Spectra for **13**

DZF-289A  
DZF-289A-H

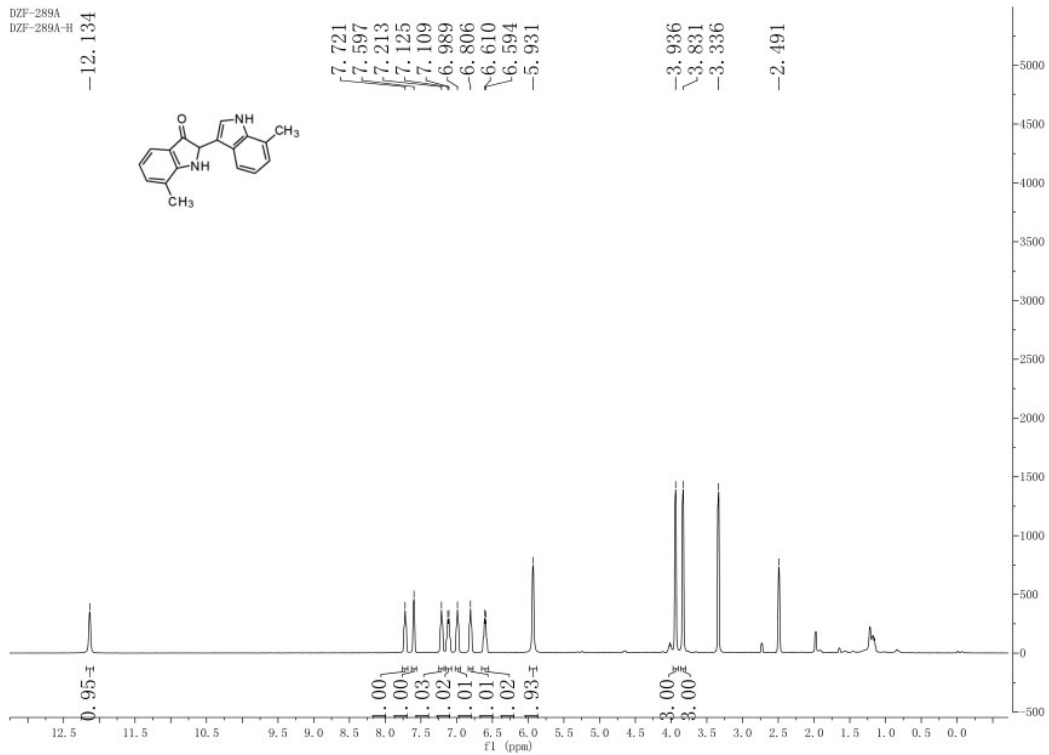

DZF-289A  
DZF-289A-C13

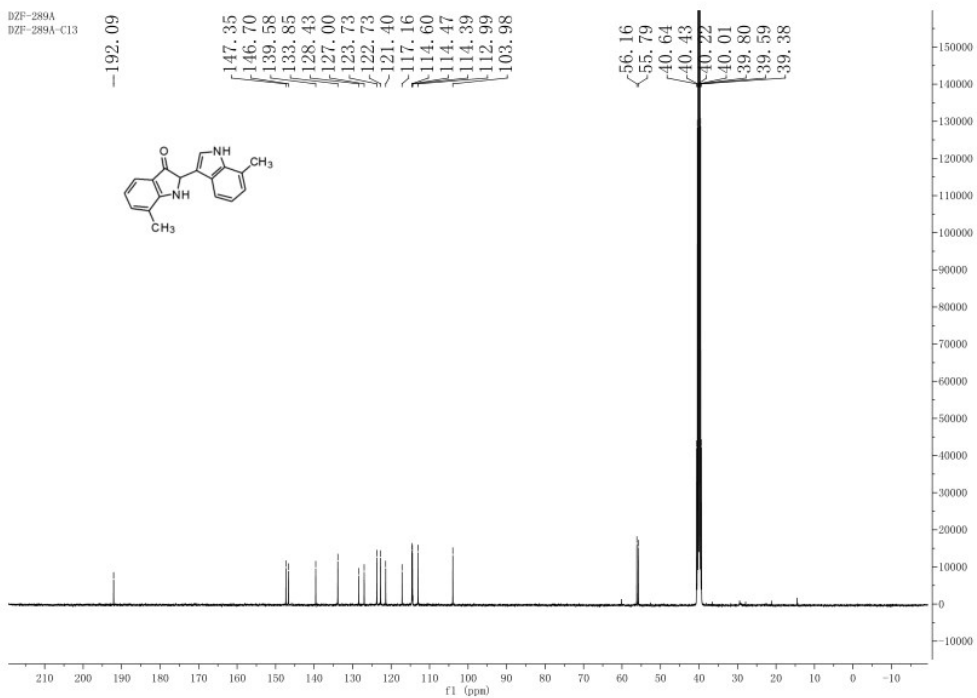

#### 4. Copies of HRESIMS Spectra



### 2,3'-Bi(3*H*-indol)-3-one (**9a**)

1\_150121170040 #2-20 RT: 0.01-0.07 AV: 19 NL: 4.06E6  
T: FTMS + p APCI corona Full ms [240.00-450.00]

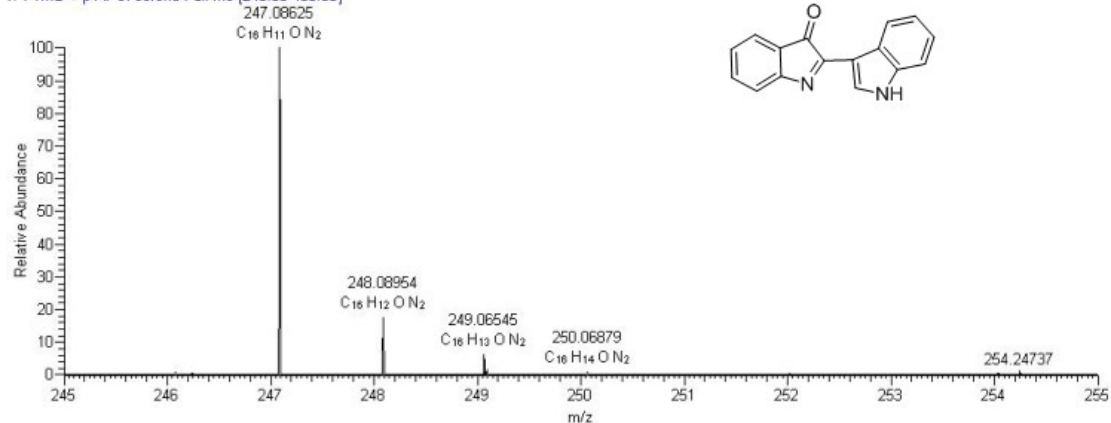

### 5,5'-Difluoro-2,3'-bi(3*H*-indol)-3-one (**9b**)

8 #2 RT: 0.01 AV: 1 NL: 2.25E6  
T: FTMS + p APCI corona Full ms [270.00-320.00]

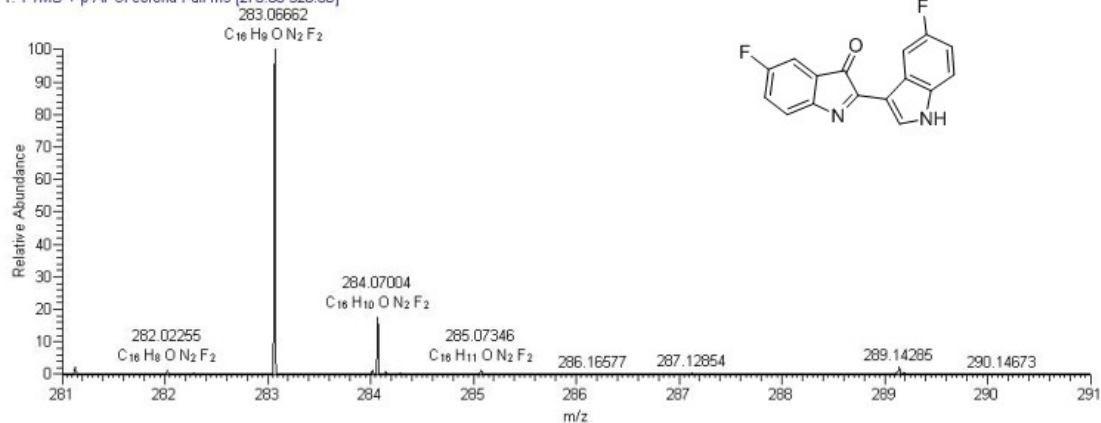

### 5,5'-Dibromo-2,3'-bi(3*H*-indol)-3-one (**9c**)

2 #2-34 RT: 0.01-0.12 AV: 33 NL: 4.51E5  
T: FTMS + p APCI corona Full ms [240.00-450.00]

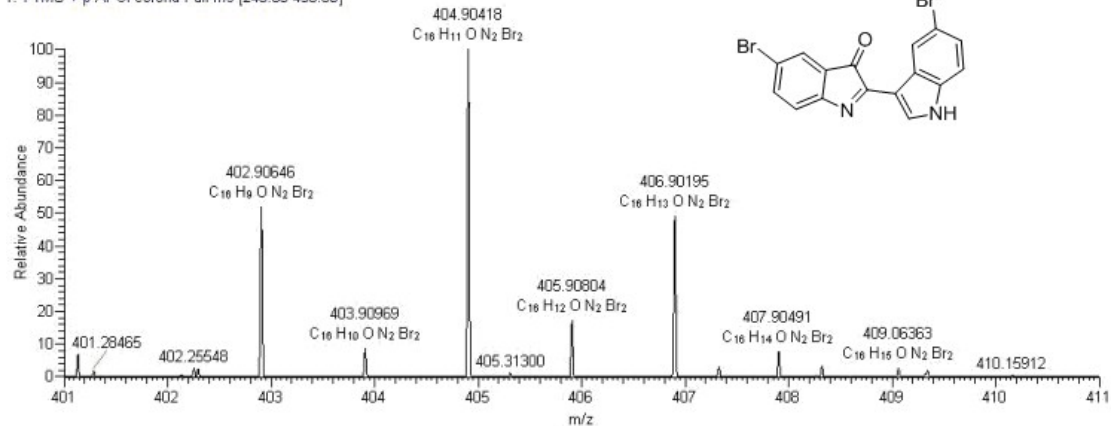

### 5,5'-Dimethyl-2,3'-bi(3*H*-indol)-3-one (**9d**)

6\_150121171838 #64 RT: 0.22 AV: 1 NL: 7.52E6  
T: FTMS + p APCI corona Full ms [272.00-283.00]

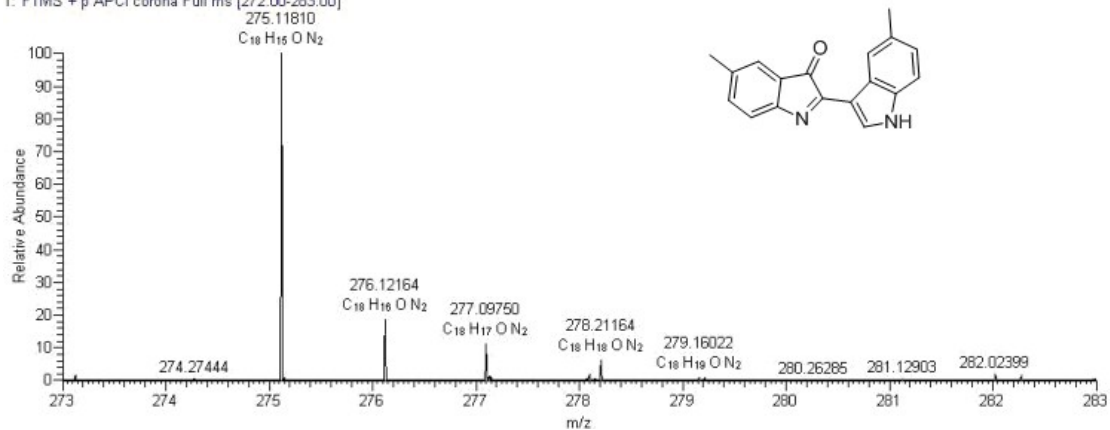

### 5,5'-Dimethoxy-2,3'-bi(3H-indol)-3-one (9e)

4 #62 RT: 0.31 AV: 1 NL: 4.26E7  
T: FTMS + p APCI corona Full ms [270.00-320.00]

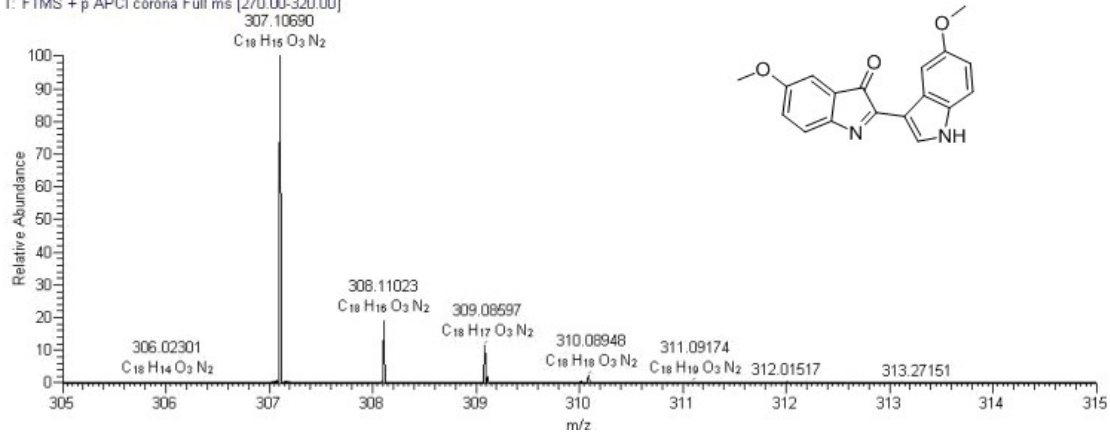

### 5,5'-Bis(benzyloxy)-2,3'-bi(3H-indol)-3-one (9f)

11 #2-28 RT: 0.01-0.10 AV: 27 NL: 5.06E4  
T: FTMS + p APCI corona Full ms [260.00-500.00]

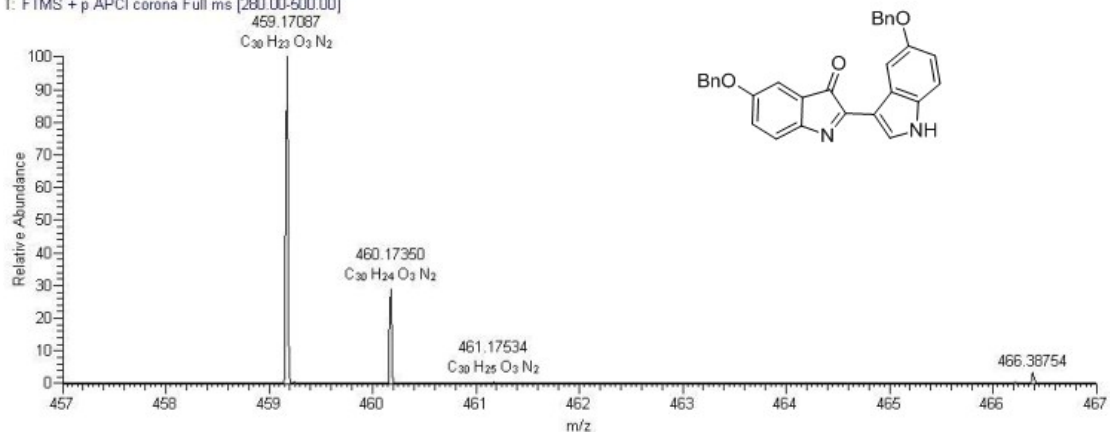

### 6,6'-Difluoro-2,3'-bi(3H-indol)-3-one (9g)

9 #1-6 RT: 0.01-0.02 AV: 6 NL: 2.02E6  
 T: FTMS + p APCI corona Full ms [280.00-415.00]

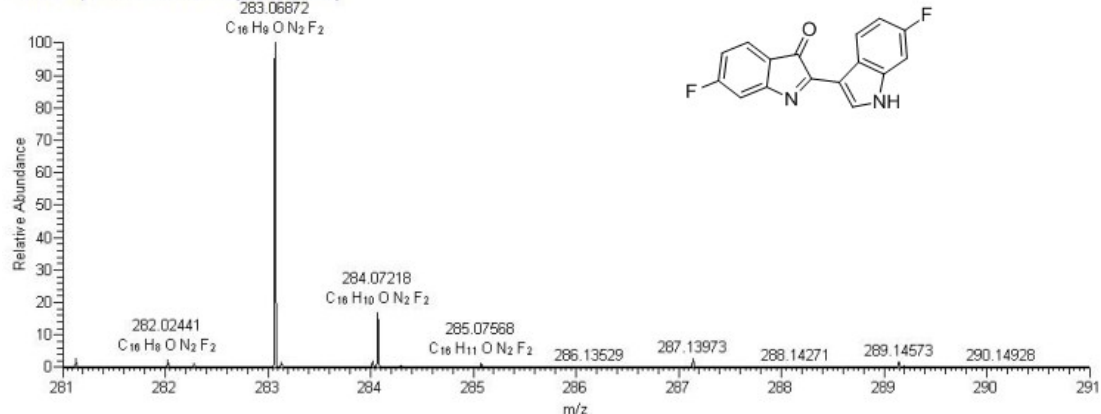

### 6,6'-Dichloro-2,3'-bi(3H-indol)-3-one (9h)

12 #2 RT: 0.01 AV: 1 NL: 7.14E5  
 T: FTMS + p APCI corona Full ms [310.00-330.00]

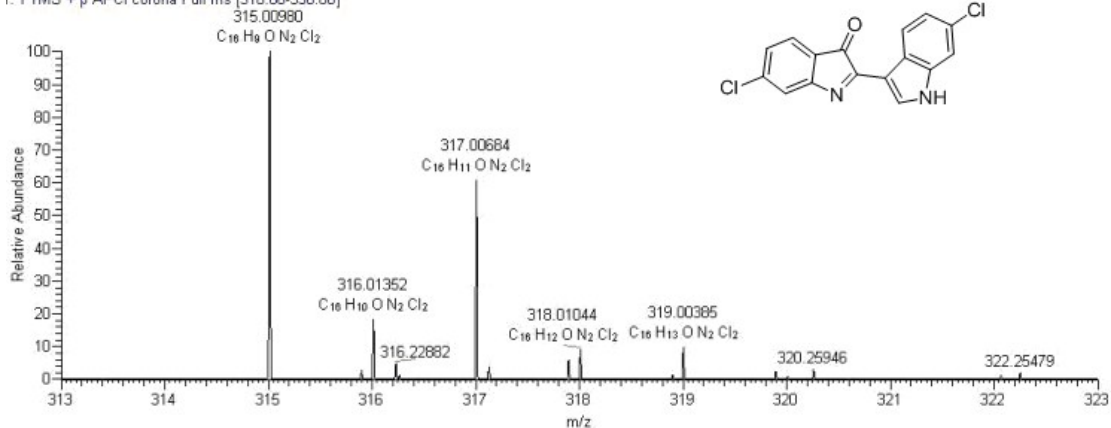

### 6,6'-Dimethyl-2,3'-bi(3H-indol)-3-one (9i)

14 #93 RT: 0.32 AV: 1 NL: 7.64E6  
 T: FTMS + p APCI corona Full ms [270.00-283.00]

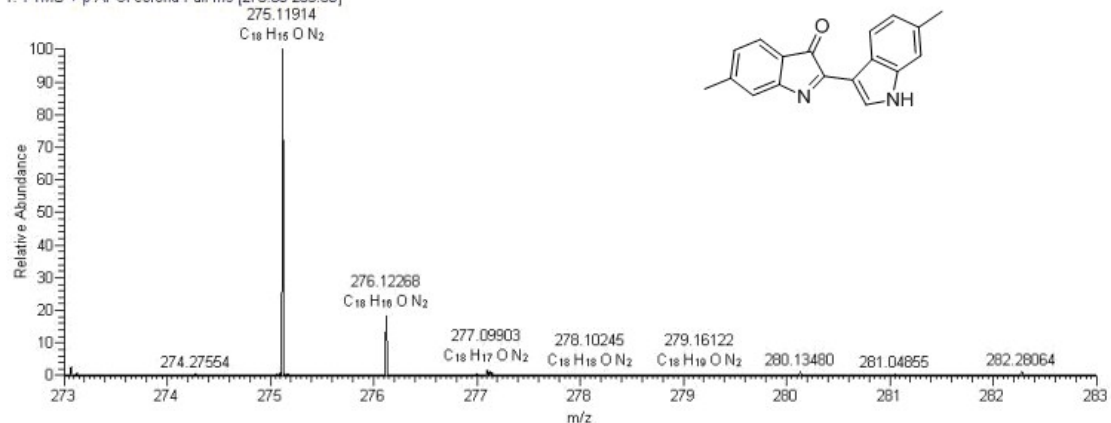

### 7,7'-Dichloro-2,3'-bi(3H-indol)-3-one (9j)

13 #4 RT: 0.02 AV: 1 NL: 9.69E5  
 T: FTMS + p APCI corona Full ms [310.00-330.00]

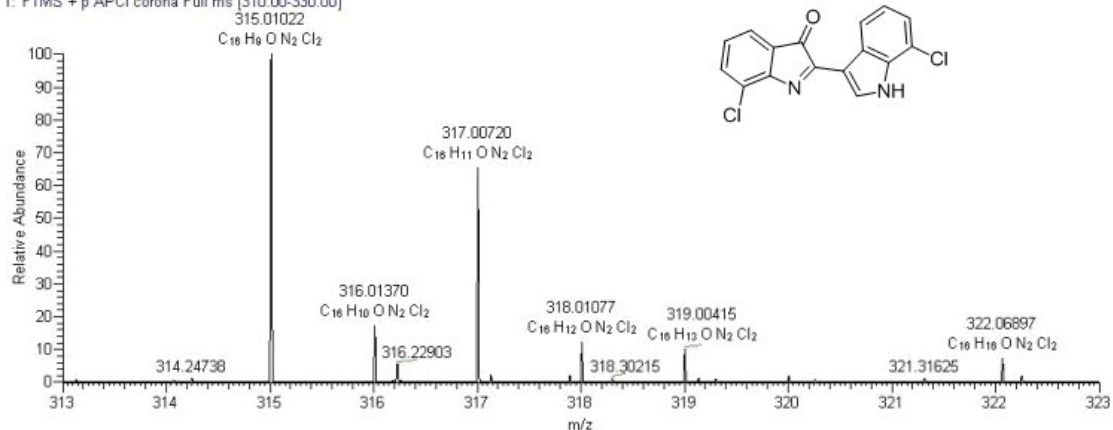

### 7,7'-Dibromo-2,3'-bi(3H-indol)-3-one (9k)

5 #2-5 RT: 0.01-0.02 AV: 4 NL: 7.70E5  
 T: FTMS + p APCI corona Full ms [380.00-415.00]

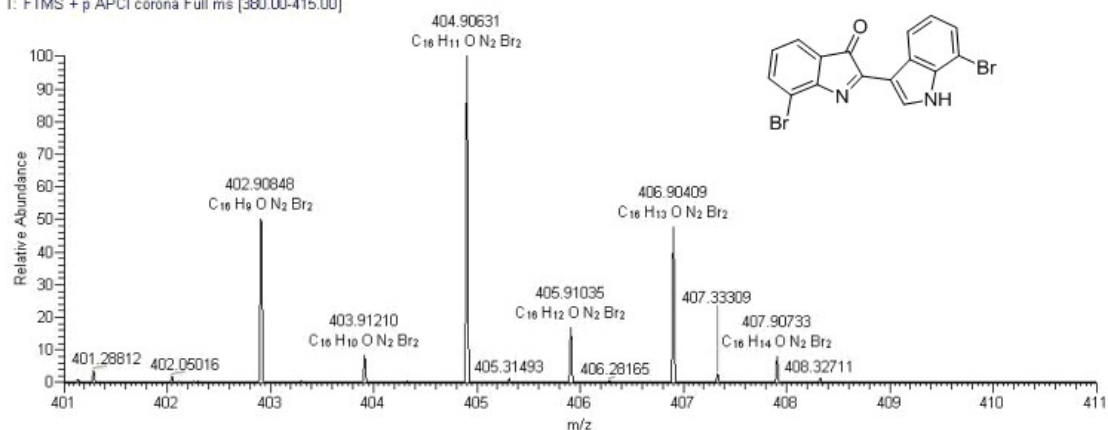

### 7,7'-Dimethyl-2,3'-bi(3H-indol)-3-one (9l)

3\_150121171005 #2-7 RT: 0.01-0.03 AV: 6 NL: 4.86E6  
 T: FTMS + p APCI corona Full ms [270.00-300.00]

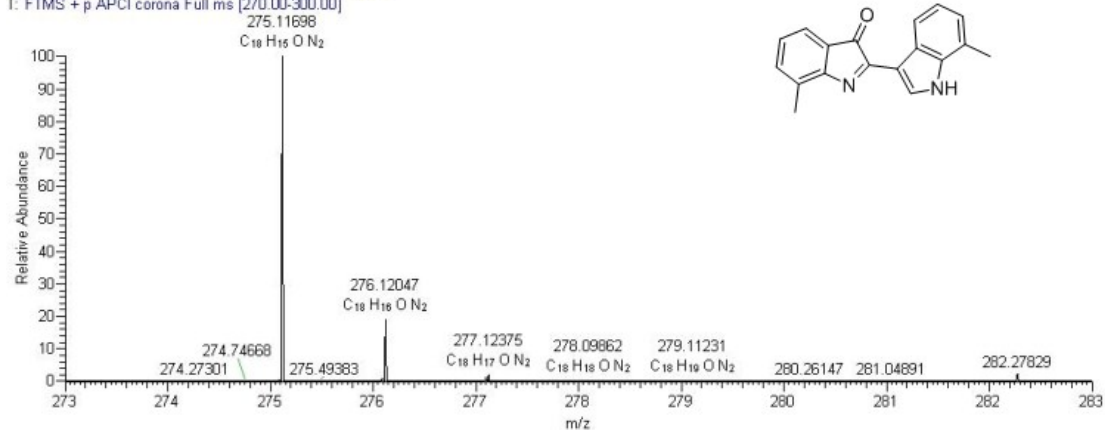

### 7,7'-Dimethoxy-2,3'-bi(3H-indol)-3-one (9m)

7 #2-11 RT: 0.01-0.04 AV: 10 NL: 7.25E6  
T: FTMS + p APCI corona Full ms [270.00-320.00]

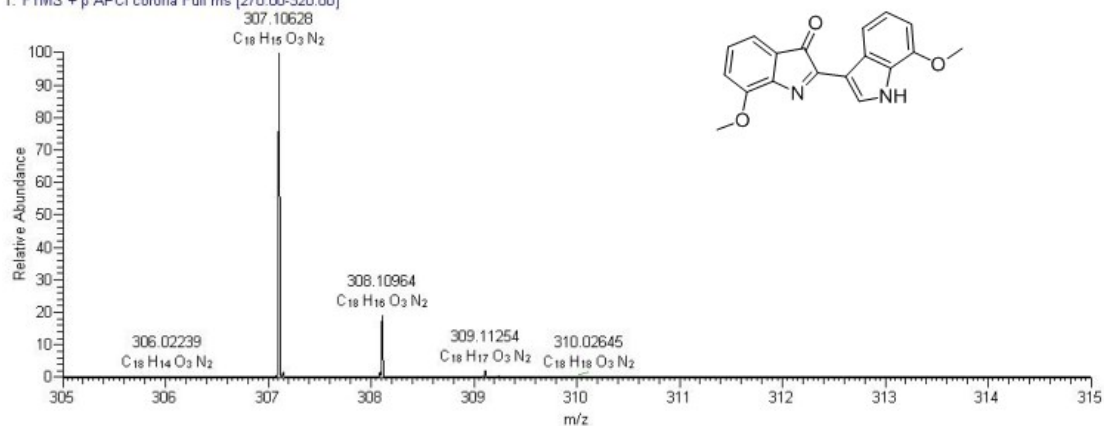

### 7,7'-Bis(benzyloxy)-2,3'-bi(3H-indol)-3-one (9n)

10\_150121172708 #1-11 RT: 0.01-0.04 AV: 11 NL: 3.09E5  
T: FTMS + p APCI corona Full ms [280.00-500.00]

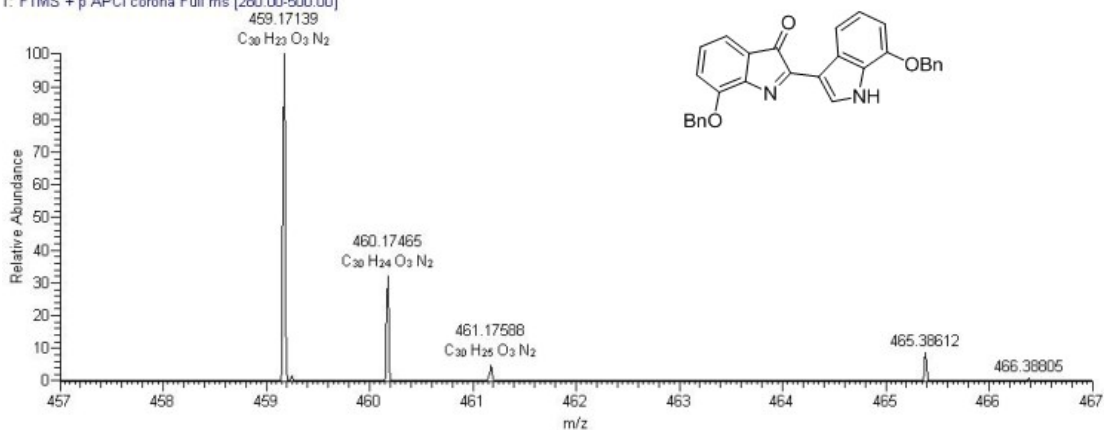

### Dimethyl 3-oxo-2,3'-bi(3H-indole)-6,6'-dicarboxylate (9p)

15 #52-52 RT: 0.11-0.18 AV: 21 NL: 2.90E6  
T: FTMS - p APCI corona Full ms [350.00-380.00]

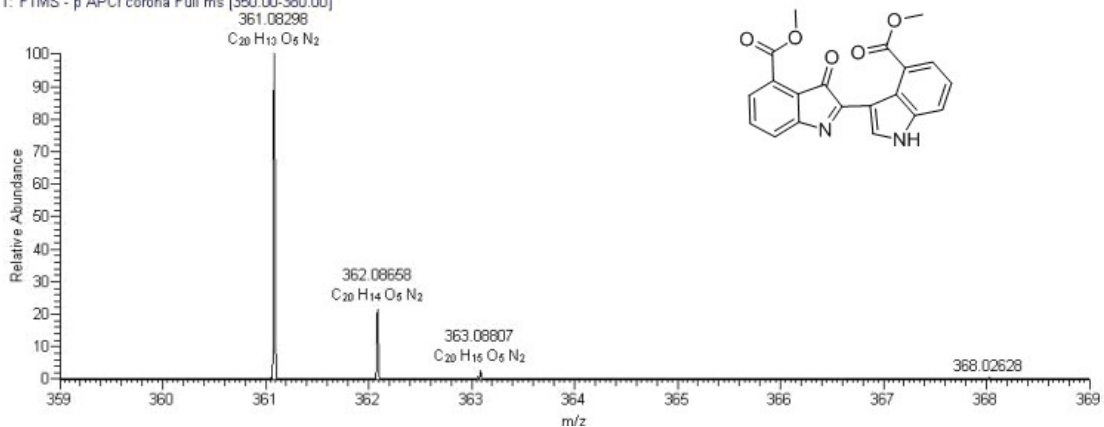

## 5. X-ray Data of Compound 9a

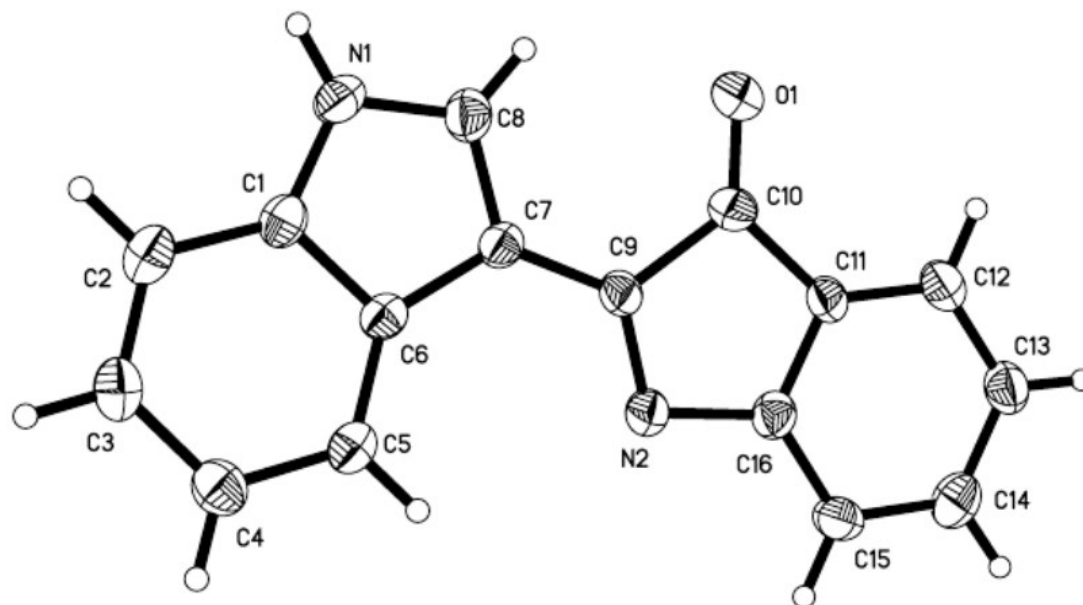

**Figure 1.** ORTEP representation of the molecular structure of **9a**.  
The data have been assigned the following deposition numbers, **CCDC 1453369**.
